# Supplementary material for: Cuproptosis related ceRNA axis AC008083.2/miR-142-3p promotes the malignant progression of nasopharyngeal carcinoma through STRN3
Source: PeerJ journal article supplement (doi:10.7717/peerj.17859), 2024-08-12
Supplement: Experimental_raw_data.zip [file Experimental_raw_data.zip]

## Sheet: Sheet1
ASO NC
																	deltCT
	ACTB	AC008083.2	AC078820.1	AL160408.4																															ASO NC		Relative	Upper	Lower								T7
	17.43	28.13	27.69	27.33													10.7	10.26	9.9	-17.43	-17.43	-17.43	-17.43	-17.43	-17.43	-17.43	-17.43	-17.43	-17.43	-17.43	-17.43					ACTB
	17.52	28.24	27.71	27.42													10.72	10.19	9.9	-17.52	-17.52	-17.52	-17.52	-17.52	-17.52	-17.52	-17.52	-17.52	-17.52	-17.52	-17.52					AC008083.2	1	1.06029	0.943138
	17.28	28.29	27.83	27.24													11.01	10.55	9.96	-17.28		-17.28	-17.28	-17.28	-17.28	-17.28	-17.28	-17.28	-17.28	-17.28						AC078820.1	1	1.05887	0.9444
																	0	0	0	0	0	0	0	0	0	0	0	0	0	0	0					AL160408.4	1	1.06229	0.941362
AVG	17.41	28.22	27.7433	27.33	#DIV/0!	#DIV/0!	#DIV/0!	#DIV/0!	#DIV/0!	#DIV/0!	#DIV/0!	#DIV/0!	#DIV/0!	#DIV/0!	#DIV/0!	#DIV/0!																				0	#DIV/0!	#DIV/0!	#DIV/0!
SD	0.121244	0.0818535	0.0757188	0.09	#DIV/0!	#DIV/0!	#DIV/0!	#DIV/0!	#DIV/0!	#DIV/0!	#DIV/0!	#DIV/0!	#DIV/0!	#DIV/0!	#DIV/0!	#DIV/0!																				0	#DIV/0!	#DIV/0!	#DIV/0!
deltSD		0.146287	0.142945	0.150997	#DIV/0!	#DIV/0!	#DIV/0!	#DIV/0!	#DIV/0!	#DIV/0!	#DIV/0!	#DIV/0!	#DIV/0!	#DIV/0!	#DIV/0!	#DIV/0!																				0	#DIV/0!	#DIV/0!	#DIV/0!
deltSE		0.0844591	0.0825295	0.087178	#DIV/0!	#DIV/0!	#DIV/0!	#DIV/0!	#DIV/0!	#DIV/0!	#DIV/0!	#DIV/0!	#DIV/0!	#DIV/0!	#DIV/0!	#DIV/0!																				0	#DIV/0!	#DIV/0!	#DIV/0!
deltCT		10.81	10.3333	9.92	#DIV/0!	#DIV/0!	#DIV/0!	#DIV/0!	#DIV/0!	#DIV/0!	#DIV/0!	#DIV/0!	#DIV/0!	#DIV/0!	#DIV/0!	#DIV/0!																				0	#DIV/0!	#DIV/0!	#DIV/0!
deltCTdeltCT		0	0	0	#DIV/0!	#DIV/0!	#DIV/0!	#DIV/0!	#DIV/0!	#DIV/0!	#DIV/0!	#DIV/0!	#DIV/0!	#DIV/0!	#DIV/0!	#DIV/0!																				0	#DIV/0!	#DIV/0!	#DIV/0!
Relative		1	1	1	#DIV/0!	#DIV/0!	#DIV/0!	#DIV/0!	#DIV/0!	#DIV/0!	#DIV/0!	#DIV/0!	#DIV/0!	#DIV/0!	#DIV/0!	#DIV/0!																				0	#DIV/0!	#DIV/0!	#DIV/0!
Upper		1.06029	1.05887	1.06229	#DIV/0!	#DIV/0!	#DIV/0!	#DIV/0!	#DIV/0!	#DIV/0!	#DIV/0!	#DIV/0!	#DIV/0!	#DIV/0!	#DIV/0!	#DIV/0!																				0	#DIV/0!	#DIV/0!	#DIV/0!
Lower		0.943138	0.9444	0.941362	#DIV/0!	#DIV/0!	#DIV/0!	#DIV/0!	#DIV/0!	#DIV/0!	#DIV/0!	#DIV/0!	#DIV/0!	#DIV/0!	#DIV/0!	#DIV/0!																				0	#DIV/0!	#DIV/0!	#DIV/0!
ASO lncRNA																																			ASO lncRNA
																	deltCT
	ACTB	AC008083.2	AC078820.1	AL160408.4	0	0	0	0	0	0	0	0	0	0	0	0																					Relative	Upper	Lower
	17.66	29.67	27.54	28.21													12.01	9.88	10.55	-17.66	-17.66	-17.66	-17.66	-17.66	-17.66	-17.66	-17.66	-17.66	-17.66	-17.66	-17.66					ACTB
	17.49	29.71	27.66	28.19													12.22	10.17	10.7	-17.49	-17.49	-17.49	-17.49	-17.49	-17.49	-17.49	-17.49	-17.49	-17.49	-17.49	-17.49					AC008083.2	0.395021	0.410789	0.379857
	17.51	29.73	27.79	28.05													12.22	10.28	10.54	-17.51		-17.51	-17.51	-17.51	-17.51	-17.51	-17.51	-17.51	-17.51	-17.51						AC078820.1	1.16743	1.24252	1.09687
																	0	0	0	0	0	0	0	0	0	0	0	0	0	0	0					AL160408.4	0.625609	0.658335	0.59451
AVG	17.5533	29.7033	27.6633	28.15	#DIV/0!	#DIV/0!	#DIV/0!	#DIV/0!	#DIV/0!	#DIV/0!	#DIV/0!	#DIV/0!	#DIV/0!	#DIV/0!	#DIV/0!	#DIV/0!																				0	#DIV/0!	#DIV/0!	#DIV/0!
SD	0.0929157	0.0305505	0.125033	0.087178	#DIV/0!	#DIV/0!	#DIV/0!	#DIV/0!	#DIV/0!	#DIV/0!	#DIV/0!	#DIV/0!	#DIV/0!	#DIV/0!	#DIV/0!	#DIV/0!																				0	#DIV/0!	#DIV/0!	#DIV/0!
deltSD		0.0978093	0.155778	0.12741	#DIV/0!	#DIV/0!	#DIV/0!	#DIV/0!	#DIV/0!	#DIV/0!	#DIV/0!	#DIV/0!	#DIV/0!	#DIV/0!	#DIV/0!	#DIV/0!																				0	#DIV/0!	#DIV/0!	#DIV/0!
deltSE		0.0564702	0.0899383	0.0735603	#DIV/0!	#DIV/0!	#DIV/0!	#DIV/0!	#DIV/0!	#DIV/0!	#DIV/0!	#DIV/0!	#DIV/0!	#DIV/0!	#DIV/0!	#DIV/0!																				0	#DIV/0!	#DIV/0!	#DIV/0!
deltCT		12.15	10.11	10.5967	#DIV/0!	#DIV/0!	#DIV/0!	#DIV/0!	#DIV/0!	#DIV/0!	#DIV/0!	#DIV/0!	#DIV/0!	#DIV/0!	#DIV/0!	#DIV/0!																				0	#DIV/0!	#DIV/0!	#DIV/0!
deltCTdeltCT		1.34	-0.223333	0.676667	#DIV/0!	#DIV/0!	#DIV/0!	#DIV/0!	#DIV/0!	#DIV/0!	#DIV/0!	#DIV/0!	#DIV/0!	#DIV/0!	#DIV/0!	#DIV/0!																				0	#DIV/0!	#DIV/0!	#DIV/0!
Relative		0.395021	1.16743	0.625609	#DIV/0!	#DIV/0!	#DIV/0!	#DIV/0!	#DIV/0!	#DIV/0!	#DIV/0!	#DIV/0!	#DIV/0!	#DIV/0!	#DIV/0!	#DIV/0!																				0	#DIV/0!	#DIV/0!	#DIV/0!
Upper		0.410789	1.24252	0.658335	#DIV/0!	#DIV/0!	#DIV/0!	#DIV/0!	#DIV/0!	#DIV/0!	#DIV/0!	#DIV/0!	#DIV/0!	#DIV/0!	#DIV/0!	#DIV/0!																				0	#DIV/0!	#DIV/0!	#DIV/0!
Lower		0.379857	1.09687	0.59451	#DIV/0!	#DIV/0!	#DIV/0!	#DIV/0!	#DIV/0!	#DIV/0!	#DIV/0!	#DIV/0!	#DIV/0!	#DIV/0!	#DIV/0!	#DIV/0!																				0	#DIV/0!	#DIV/0!	#DIV/0!
p-Value		0.00279425	0.15599	0.00526638	0.203826	0.203826	0.203826	0.203826	0.203826	0.203826	0.203826	0.203826	0.203826	0.203826	0.203826	0.203826
