# Supplementary material for: Cuproptosis related ceRNA axis AC008083.2/miR-142-3p promotes the malignant progression of nasopharyngeal carcinoma through STRN3
Source: PeerJ journal article supplement (doi:10.7717/peerj.17859), 2024-08-12

GO.pathway

positive regulation of cell proliferation

B cell proliferation

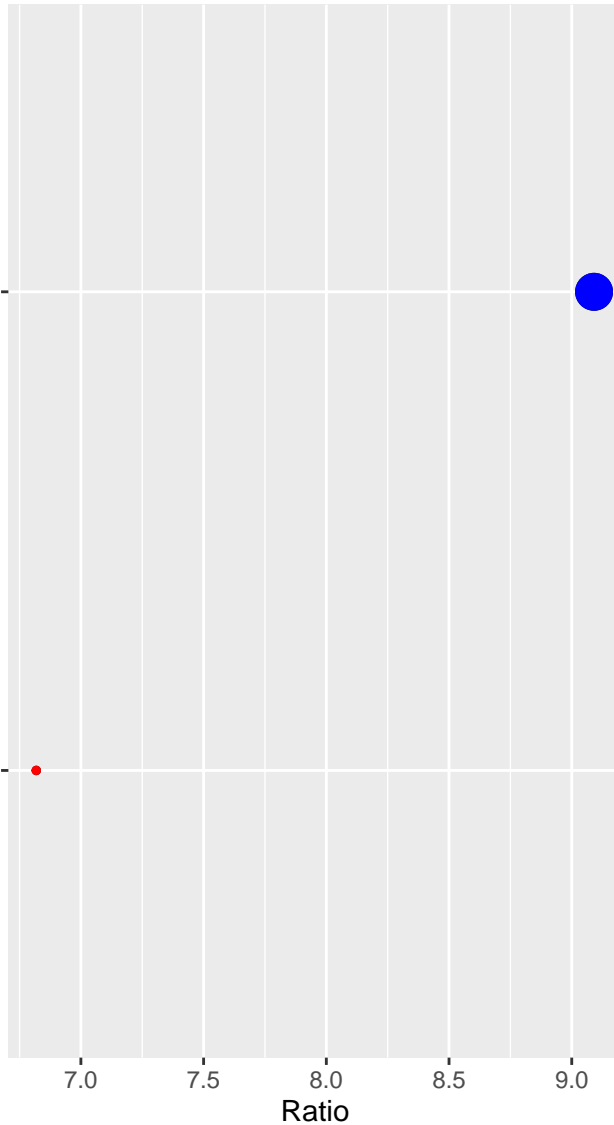

Counts

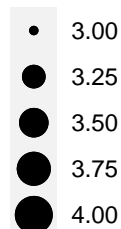

$-\log_{10}(\text{P Value})$

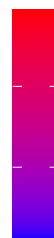

Supplement: Experimental_raw_data.zip [file Experimental_raw_data.zip]
