# Supplementary material for: Cuproptosis related ceRNA axis AC008083.2/miR-142-3p promotes the malignant progression of nasopharyngeal carcinoma through STRN3
Source: PeerJ. 2024 Aug 12;12:e17859. doi: 10.7717/peerj.17859 (PMC11326429; doi:10.7717/peerj.17859)
Supplement: Supplemental Information 8 [file peerj-12-17859-s008.xls]

## Sheet: Sheet1
ITEM TO CHECK	IMPORTANCE	CHECKLIST
EXPERIMENTAL DESIGN
Definition of experimental and control groups	E	Figure legends: Figure 4D；Figure6 A-C
Number within each group	E	Figure legends: Figure 4D；Figure6 A-C
Assay carried out by core lab or investigator's lab?	D	N/A
Acknowledgement of authors' contributions	D	Line 404-408
SAMPLE
Description	E
Volume/mass of sample processed	D	6 well cell plate/1 mL trizol each well
Microdissection or macrodissection	E	N/A
Processing procedure	E
If frozen - how and how quickly?	E	N/A
If fixed - with what, how quickly?	E	N/A
Sample storage conditions and duration (especially for FFPE samples)	E	liquid nitrogen
NUCLEIC ACID EXTRACTION
Procedure and/or instrumentation	E
Name of kit and details of any modifications	E	Invitrogen, 15596026. Line 170
Source of additional reagents used	D	N/A
Details of DNase or RNAse treatment	E	RNA/DNA free water and materials
Contamination assessment (DNA or RNA)	E
Nucleic acid quantification	E	Line 171-172
Instrument and method	E	NANODROP ONEc (Thermo scientfic, America). Line 171-172
Purity (A260/A280)	D	NANODROP ONEc (Thermo scientfic, America) and agarose gel electrophoresis (1%, 140V, 25min). Line 171-172
Yield	D	N/A
RNA integrity method/instrument	E	NANODROP ONEc (Thermo scientfic, America) and agarose gel electrophoresis (1%, 140V, 25min). Line 171-172
RIN/RQI or Cq of 3' and 5' transcripts	E	agarose gel electrophoresis (1%, 140V, 25min). Line 171-172
Electrophoresis traces	D
Inhibition testing (Cq dilutions, spike or other)	E	N/A
REVERSE TRANSCRIPTION
Complete reaction conditions	E	Takara, RR047A. Line 173
Amount of RNA and reaction volume	E	20ul, 1000ng RNA. Line 173-174
Priming oligonucleotide (if using GSP) and concentration	E	N/A
Reverse transcriptase and concentration	E	Takara, RR047A. Line 173
Temperature and time	E	Takara, RR047A. Line 173
Manufacturer of reagents and catalogue numbers	D	Takara, RR047A. Line 173
Cqs with and without RT	D*
Storage conditions of cDNA	D
qPCR TARGET INFORMATION
If multiplex, efficiency and LOD of each assay.	E	Biological Replicates: n=3. Figure legends
Sequence accession number	E	N/A
Location of amplicon	D
Amplicon length	E	Amplicon length was controlled between 100-150
In silico specificity screen (BLAST, etc)	E	specificity screen through Primer-Blast
Pseudogenes, retropseudogenes or other homologs?	D
Sequence alignment	D
Secondary structure analysis of amplicon	D
Location of each primer by exon or intron (if applicable)	E	N/A
What splice variants are targeted?	E	N/A
qPCR OLIGONUCLEOTIDES
Primer sequences	E	Line 177-182
RTPrimerDB Identification Number	D	N/A
Probe sequences	D**	N/A
Location and identity of any modifications	E	N/A
Manufacturer of oligonucleotides	D	sangon biotech (Shanghai, China)
Purification method	D
qPCR PROTOCOL
Complete reaction conditions	E
Reaction volume and amount of cDNA/DNA	E	100ng(1ul), Takara, RR820A. Line 176
Primer, (probe), Mg++ and dNTP concentrations	E	Takara, RR820A. Line 176
Polymerase identity and concentration	E	Takara, RR820A. Line 176
Buffer/kit identity and manufacturer	E	Takara, RR820A. Line 176
Exact chemical constitution of the buffer	D
Additives (SYBR Green I, DMSO, etc.)	E	SYBR Green I (Takara, RR820A). Line 176
Manufacturer of plates/tubes and catalog number	D	0.2ml PCR 8-strip tubes: NEST 403002; 1.5ml DNase/RNase free tubes: labselect MCT-OO1-150
Complete thermocycling parameters	E	40 cycles. Line 184
Reaction setup (manual/robotic)	D	Line 183-186
Manufacturer of qPCR instrument	E	CFX96 Real-Time System (Bio-Rad, America). Line 183
qPCR VALIDATION
Evidence of optimisation (from gradients)	D
Specificity (gel, sequence, melt, or digest)	E	Single effective melt peak
For SYBR Green I, Cq of the NTC	E	Cq of the NTC: none
Standard curves with slope and y-intercept	E	N/A
PCR efficiency calculated from slope	E	N/A
Confidence interval for PCR efficiency or standard error	D
r2 of standard curve	E	N/A
Linear dynamic range	E	N/A
Cq variation at lower limit	E	N/A
Confidence intervals throughout range	D
Evidence for limit of detection	E	N/A
If multiplex, efficiency and LOD of each assay.	E	N/A
DATA ANALYSIS
qPCR analysis program (source, version)	E	Bio-rad CFX manager 3.1. Line 183
Cq method determination	E
Outlier identification and disposition	E	Identified outliers in cq values with differences exceeding 1 and excluded them
Results of NTCs	E	Cq of the NTC: none
Justification of number and choice of reference genes	E	Line 176
Description of normalisation method	E	2−ΔΔCT. Line 187
Number and concordance of biological replicates	D
Number and stage (RT or qPCR) of technical replicates	E	N/A
Repeatability (intra-assay variation)	E	stable
Reproducibility (inter-assay variation, %CV)	D
Power analysis	D
Statistical methods for result significance	E	experimental row data
Software (source, version)	E	Bio-rad CFX manager 3.1. Line 183
Cq or raw data submission using RDML	D
Table 1. MIQE checklist for authors, reviewers and editors. All essential information (E) must be submitted with the manuscript. Desirable
information (D) should be submitted if available. If using primers obtained from RTPrimerDB, information on qPCR target, oligonucleotides,
protocols and validation is available from that source.
*: Assessing the absence of DNA using a no RT assay is essential when first extracting RNA. Once the sample has been validated as
RDNA-free, inclusion of a no-RT control is desirable, but no longer essential.
**: Disclosure of the probe sequence is highly desirable and strongly encouraged. However, since not all commercial pre-designed assay
vendors provide this information, it cannot be an essential requirement. Use of such assays is advised against.
