# Supplementary figures and images for: Cuproptosis related ceRNA axis AC008083.2/miR-142-3p promotes the malignant progression of nasopharyngeal carcinoma through STRN3
Source: PeerJ journal article supplement (doi:10.7717/peerj.17859), 2024-08-12

supressgene

down

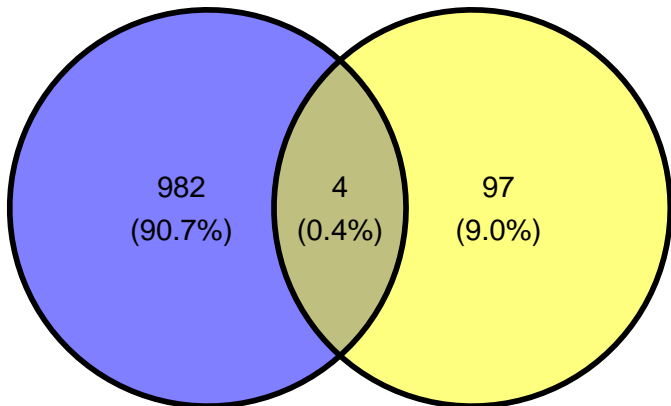

Supplement: Experimental_raw_data.zip [file Experimental_raw_data.zip]

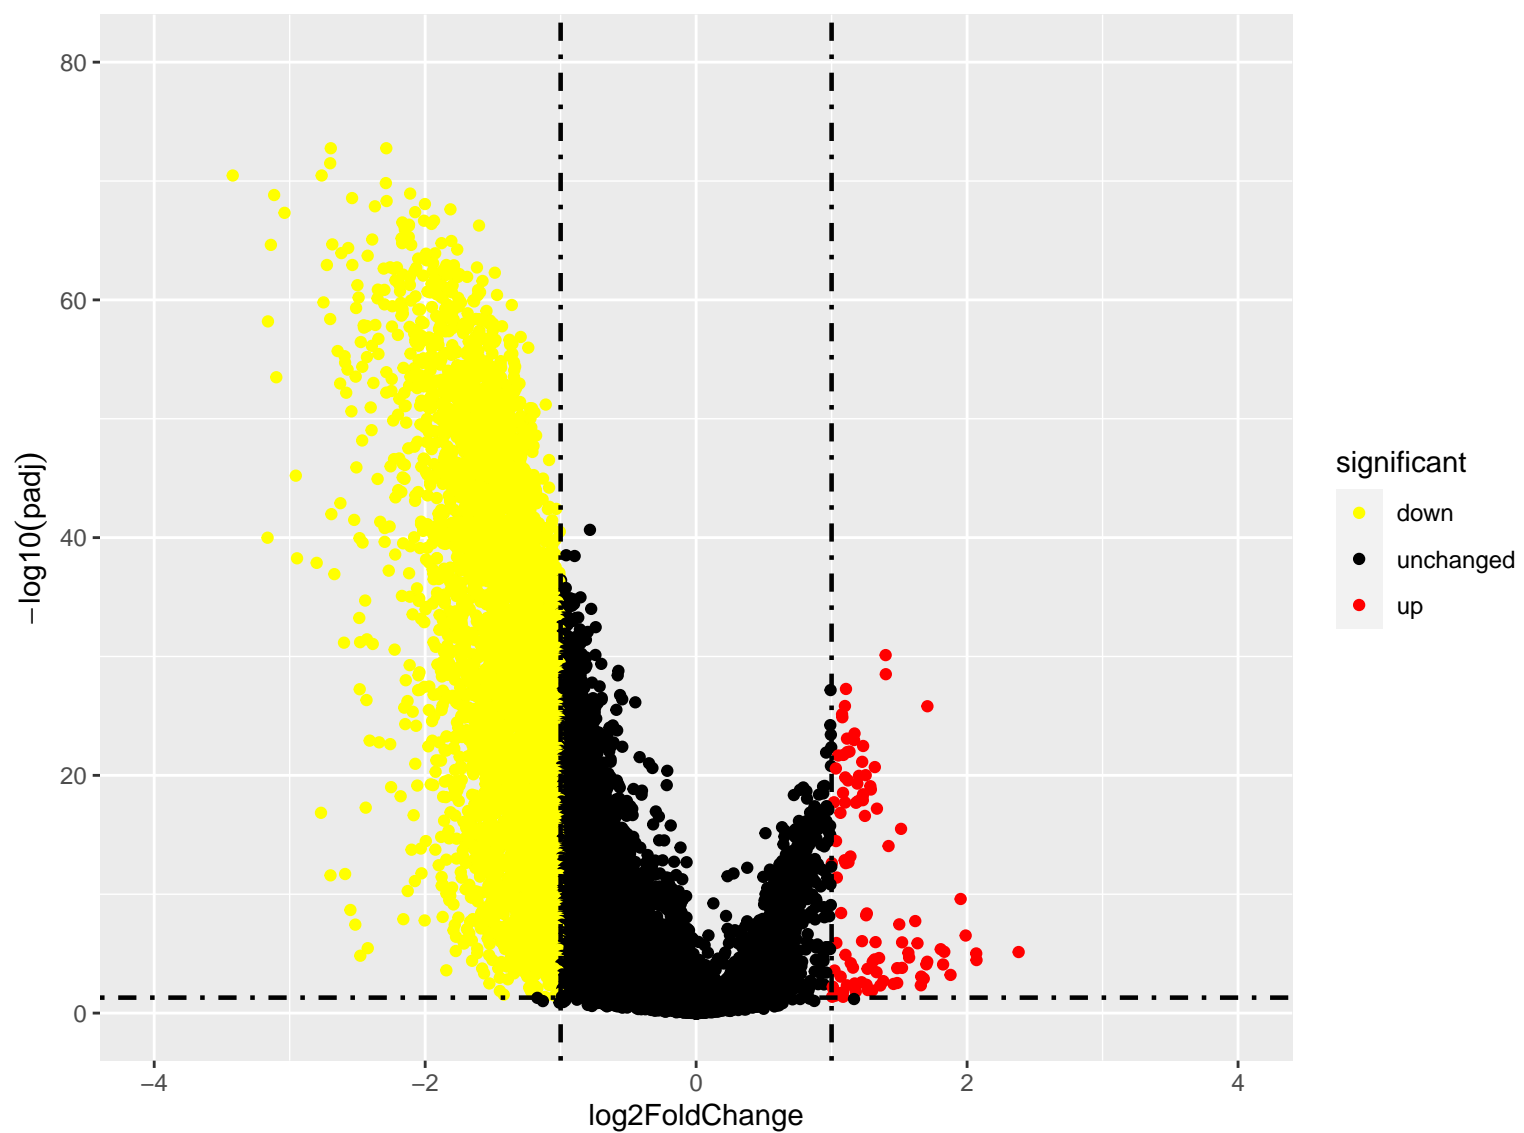

Supplement: Experimental_raw_data.zip [file Experimental_raw_data.zip]

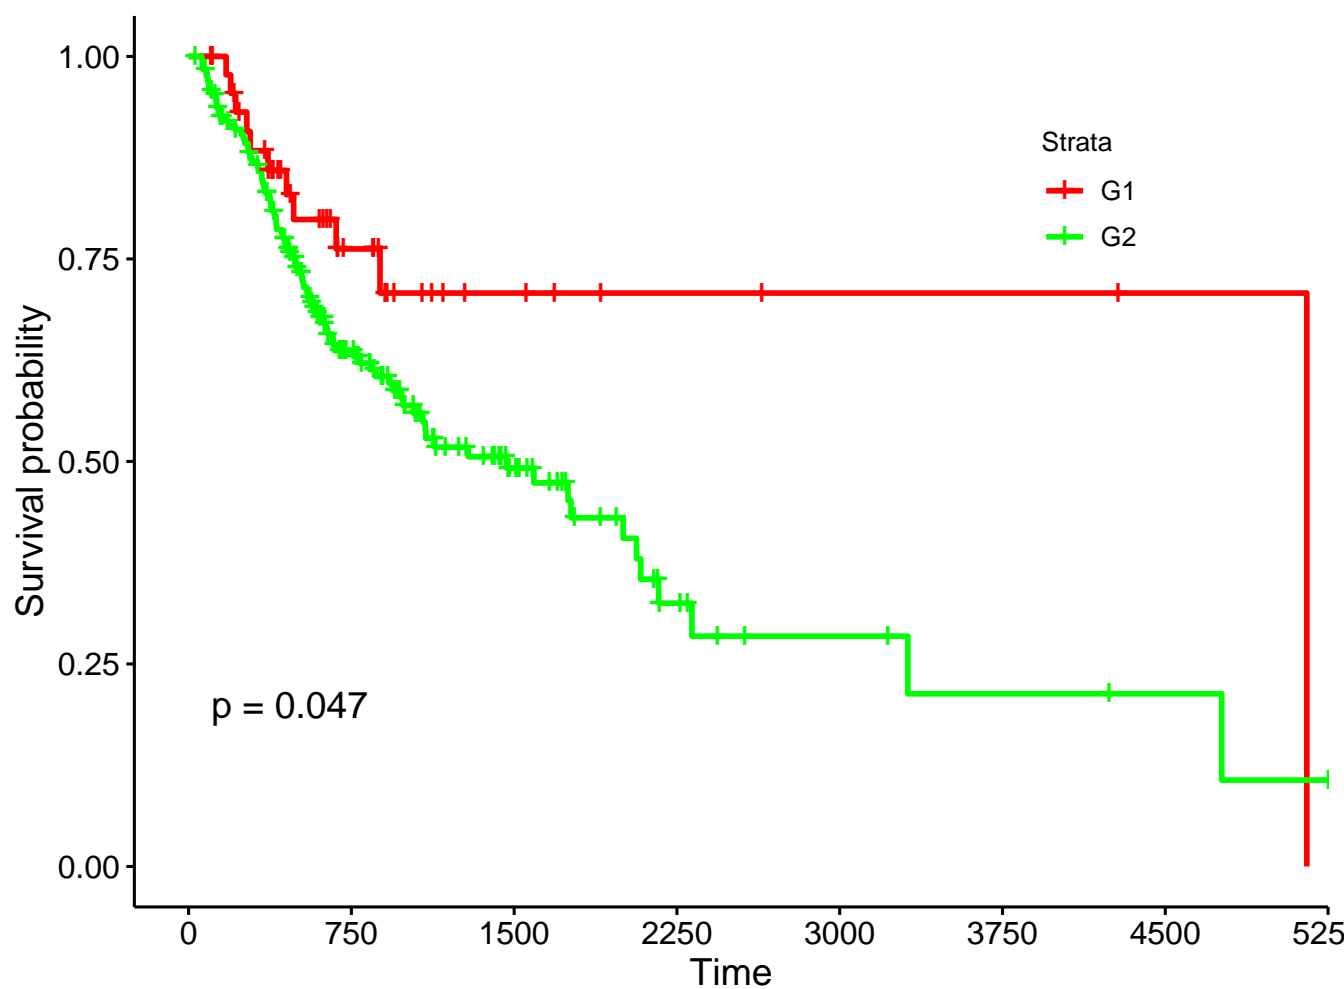

| Number at risk |    | 0   | 750 | 1500 | 2250 | 3000 | 3750 | 4500 | 5250 |
|----------------|----|-----|-----|------|------|------|------|------|------|
| Strata         | G1 | 46  | 18  | 6    | 3    | 2    | 2    | 1    | 0    |
|                | G2 | 191 | 86  | 33   | 10   | 5    | 3    | 2    | 1    |

Time

Supplement: Experimental_raw_data.zip [file Experimental_raw_data.zip]

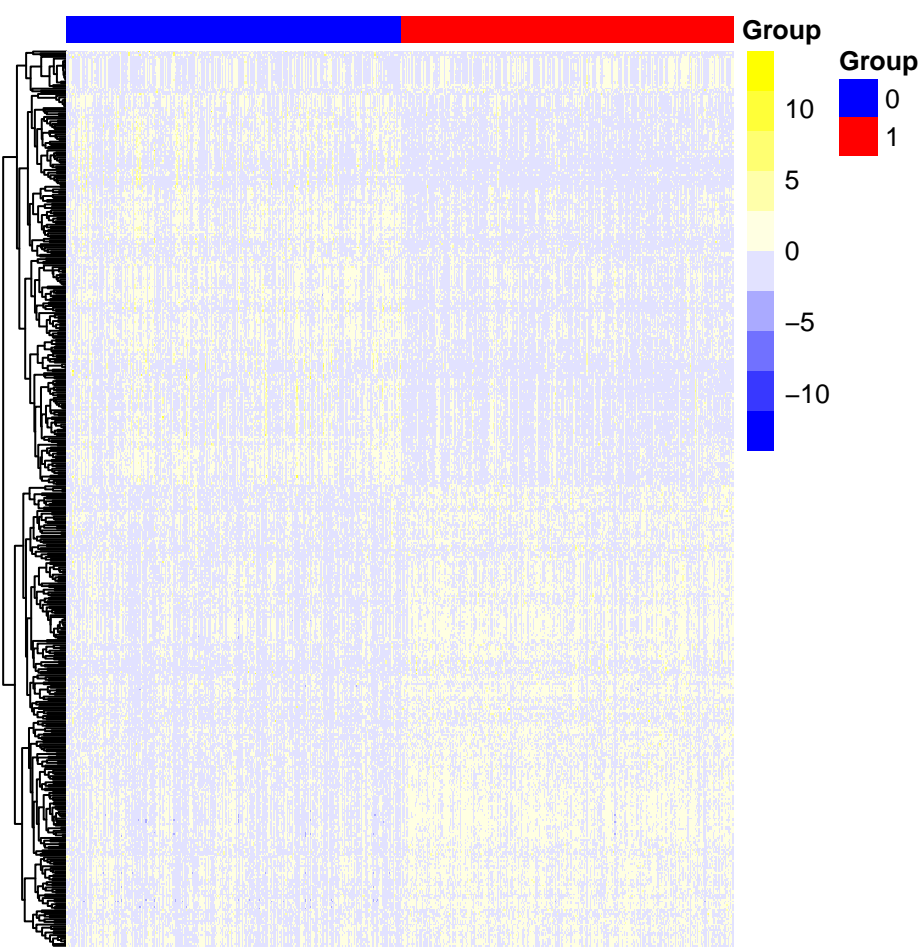

Supplement: Experimental_raw_data.zip [file Experimental_raw_data.zip]

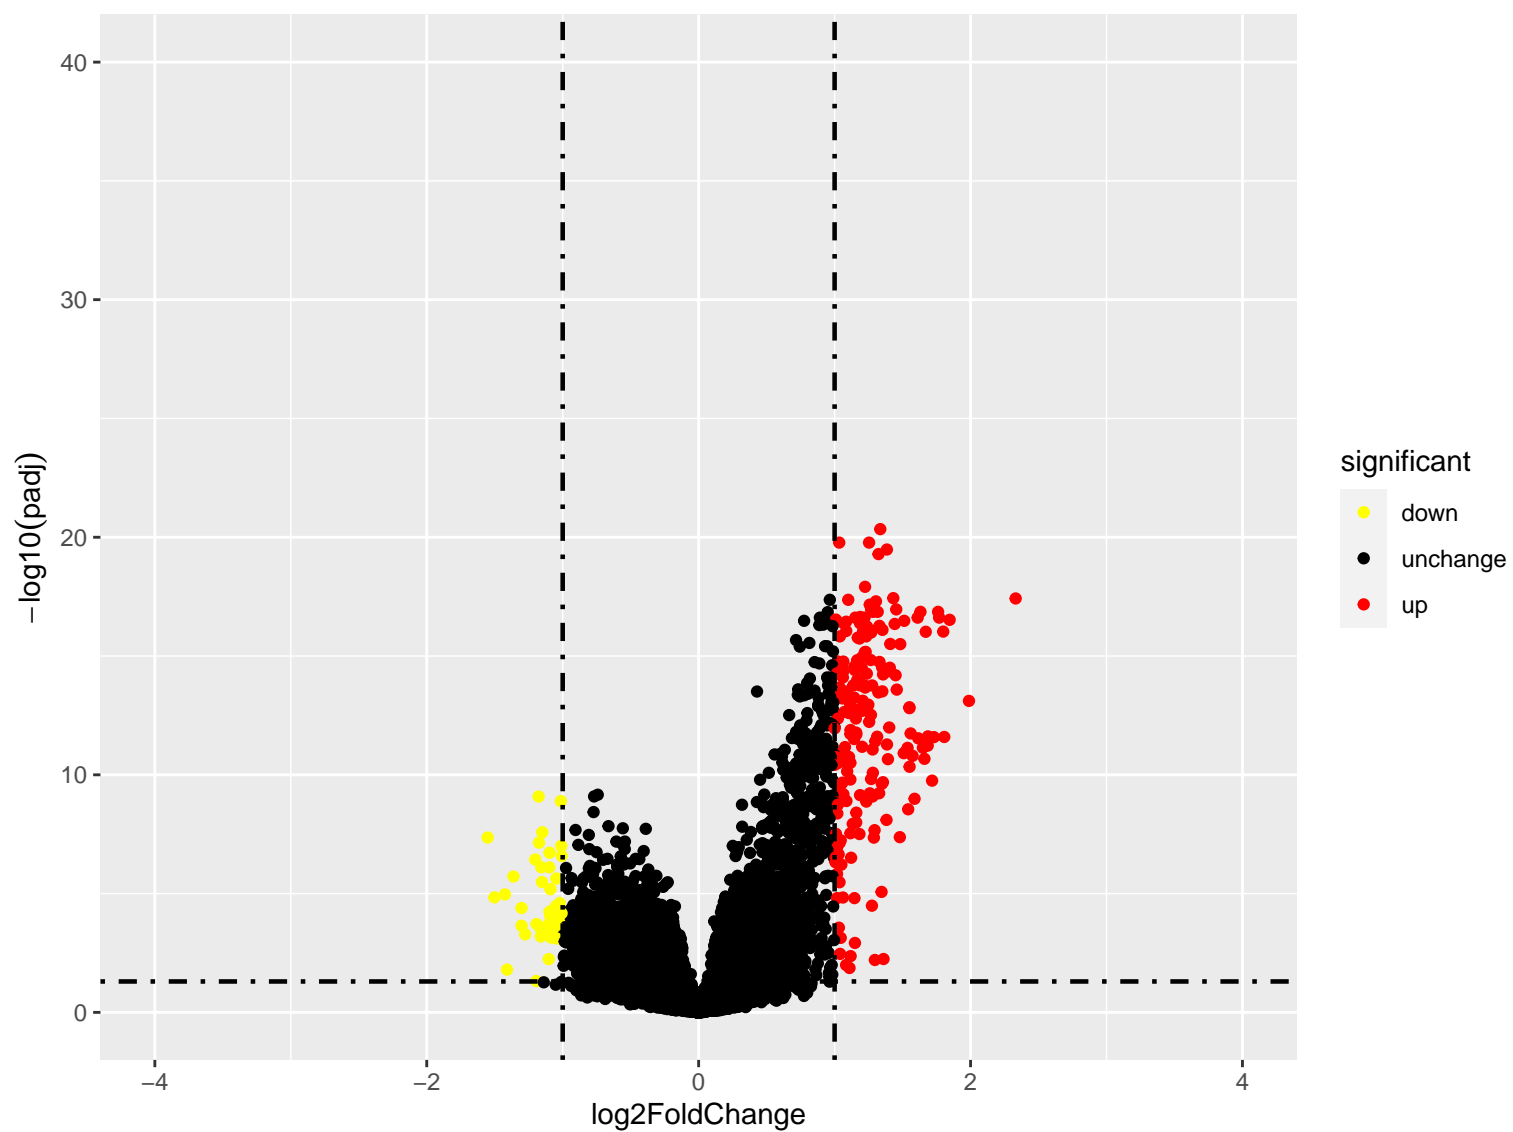

Supplement: Experimental_raw_data.zip [file Experimental_raw_data.zip]

consensus matrix k=3

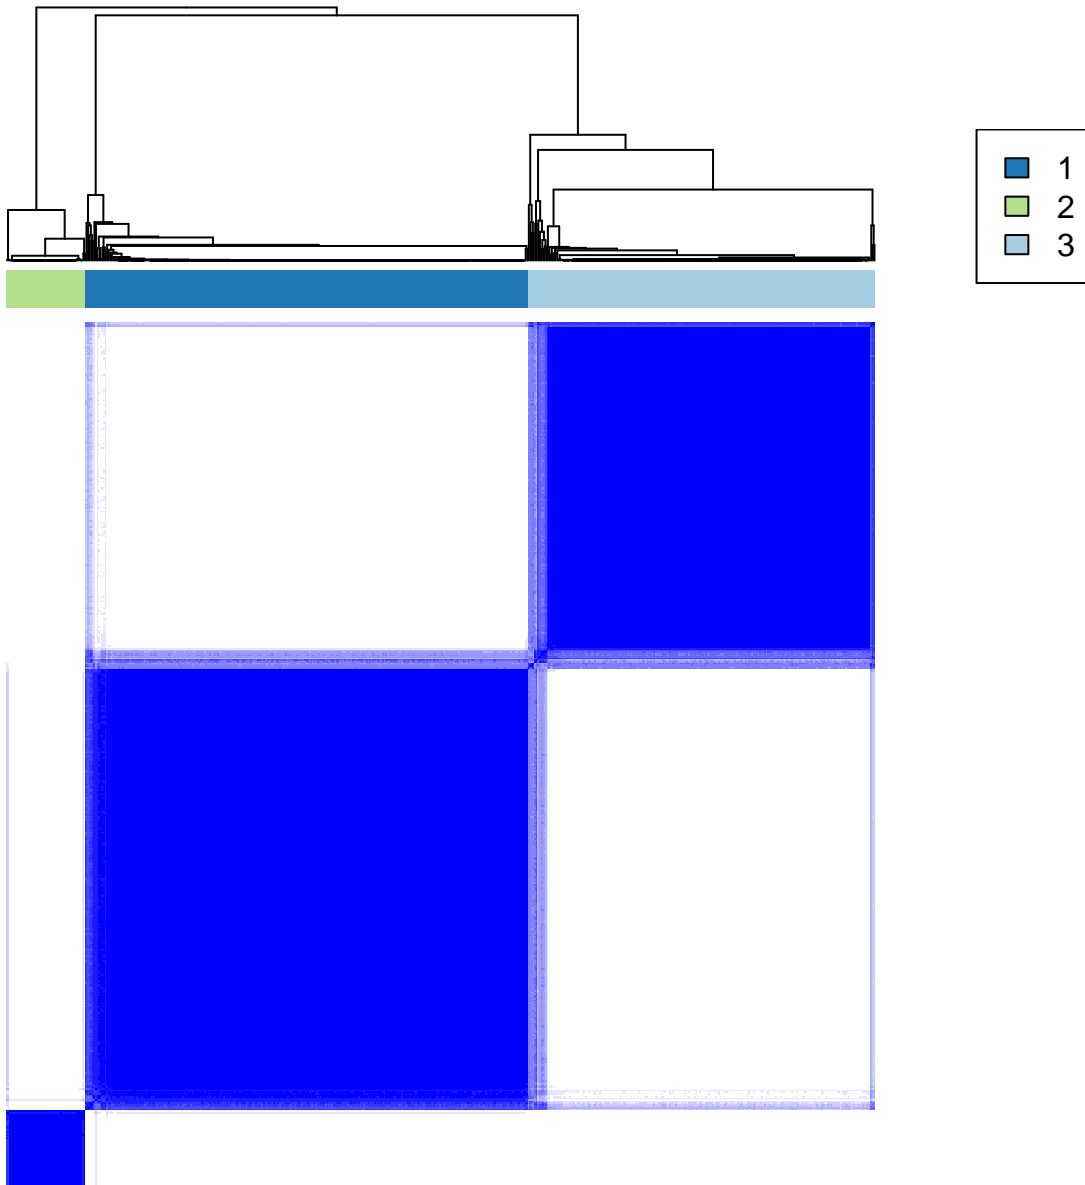

Supplement: Experimental_raw_data.zip [file Experimental_raw_data.zip]

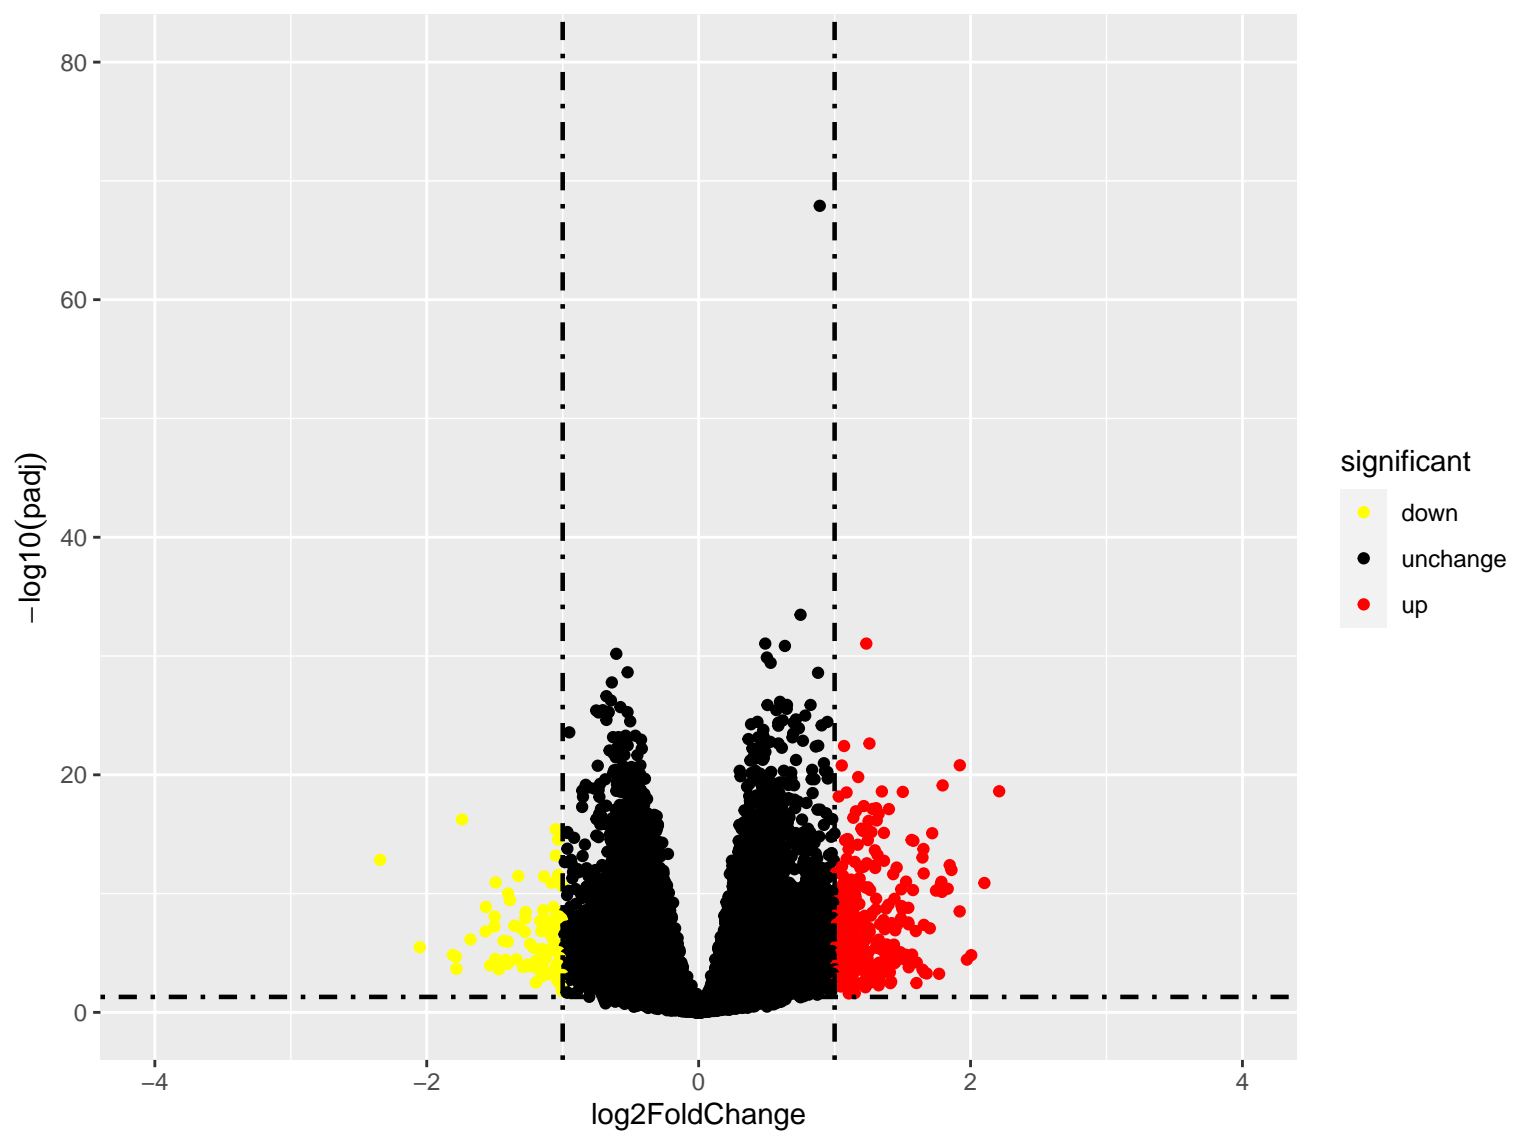

Supplement: Experimental_raw_data.zip [file Experimental_raw_data.zip]

lncRNA\_up

miRNA\_down

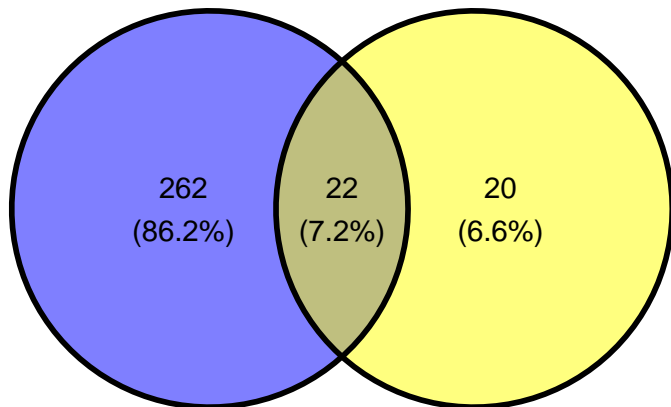

Supplement: Experimental_raw_data.zip [file Experimental_raw_data.zip]

GO.pathway

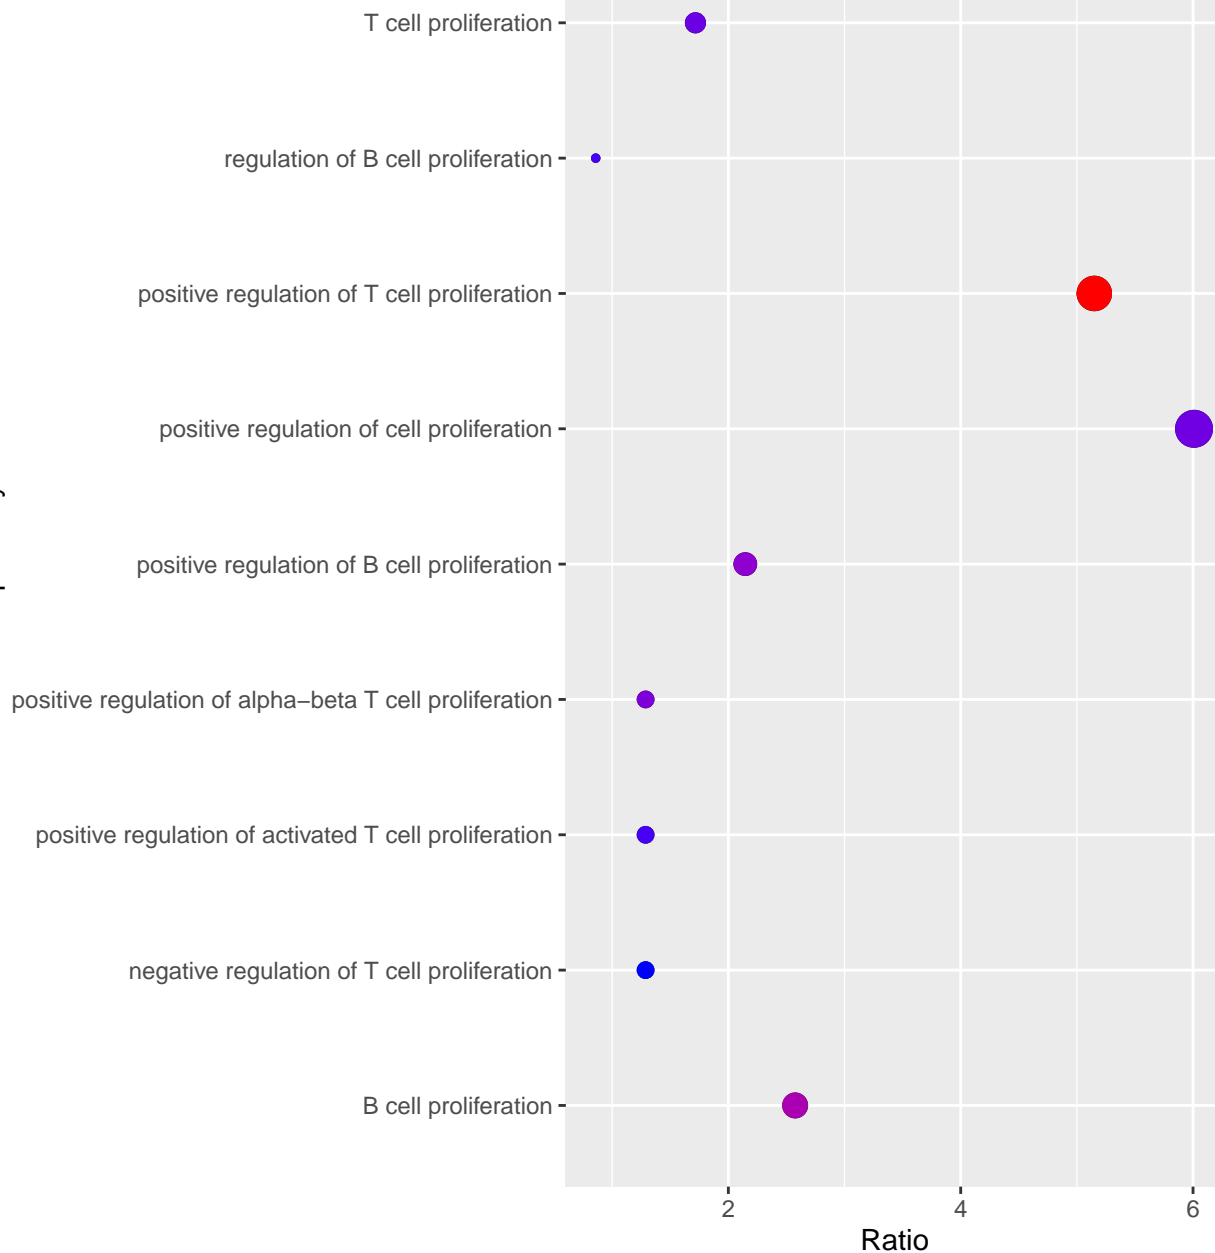

Counts

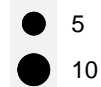

$-\log_{10}(\text{P Value})$

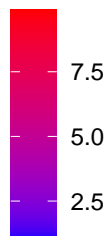

Supplement: Experimental_raw_data.zip [file Experimental_raw_data.zip]

GO.pathway

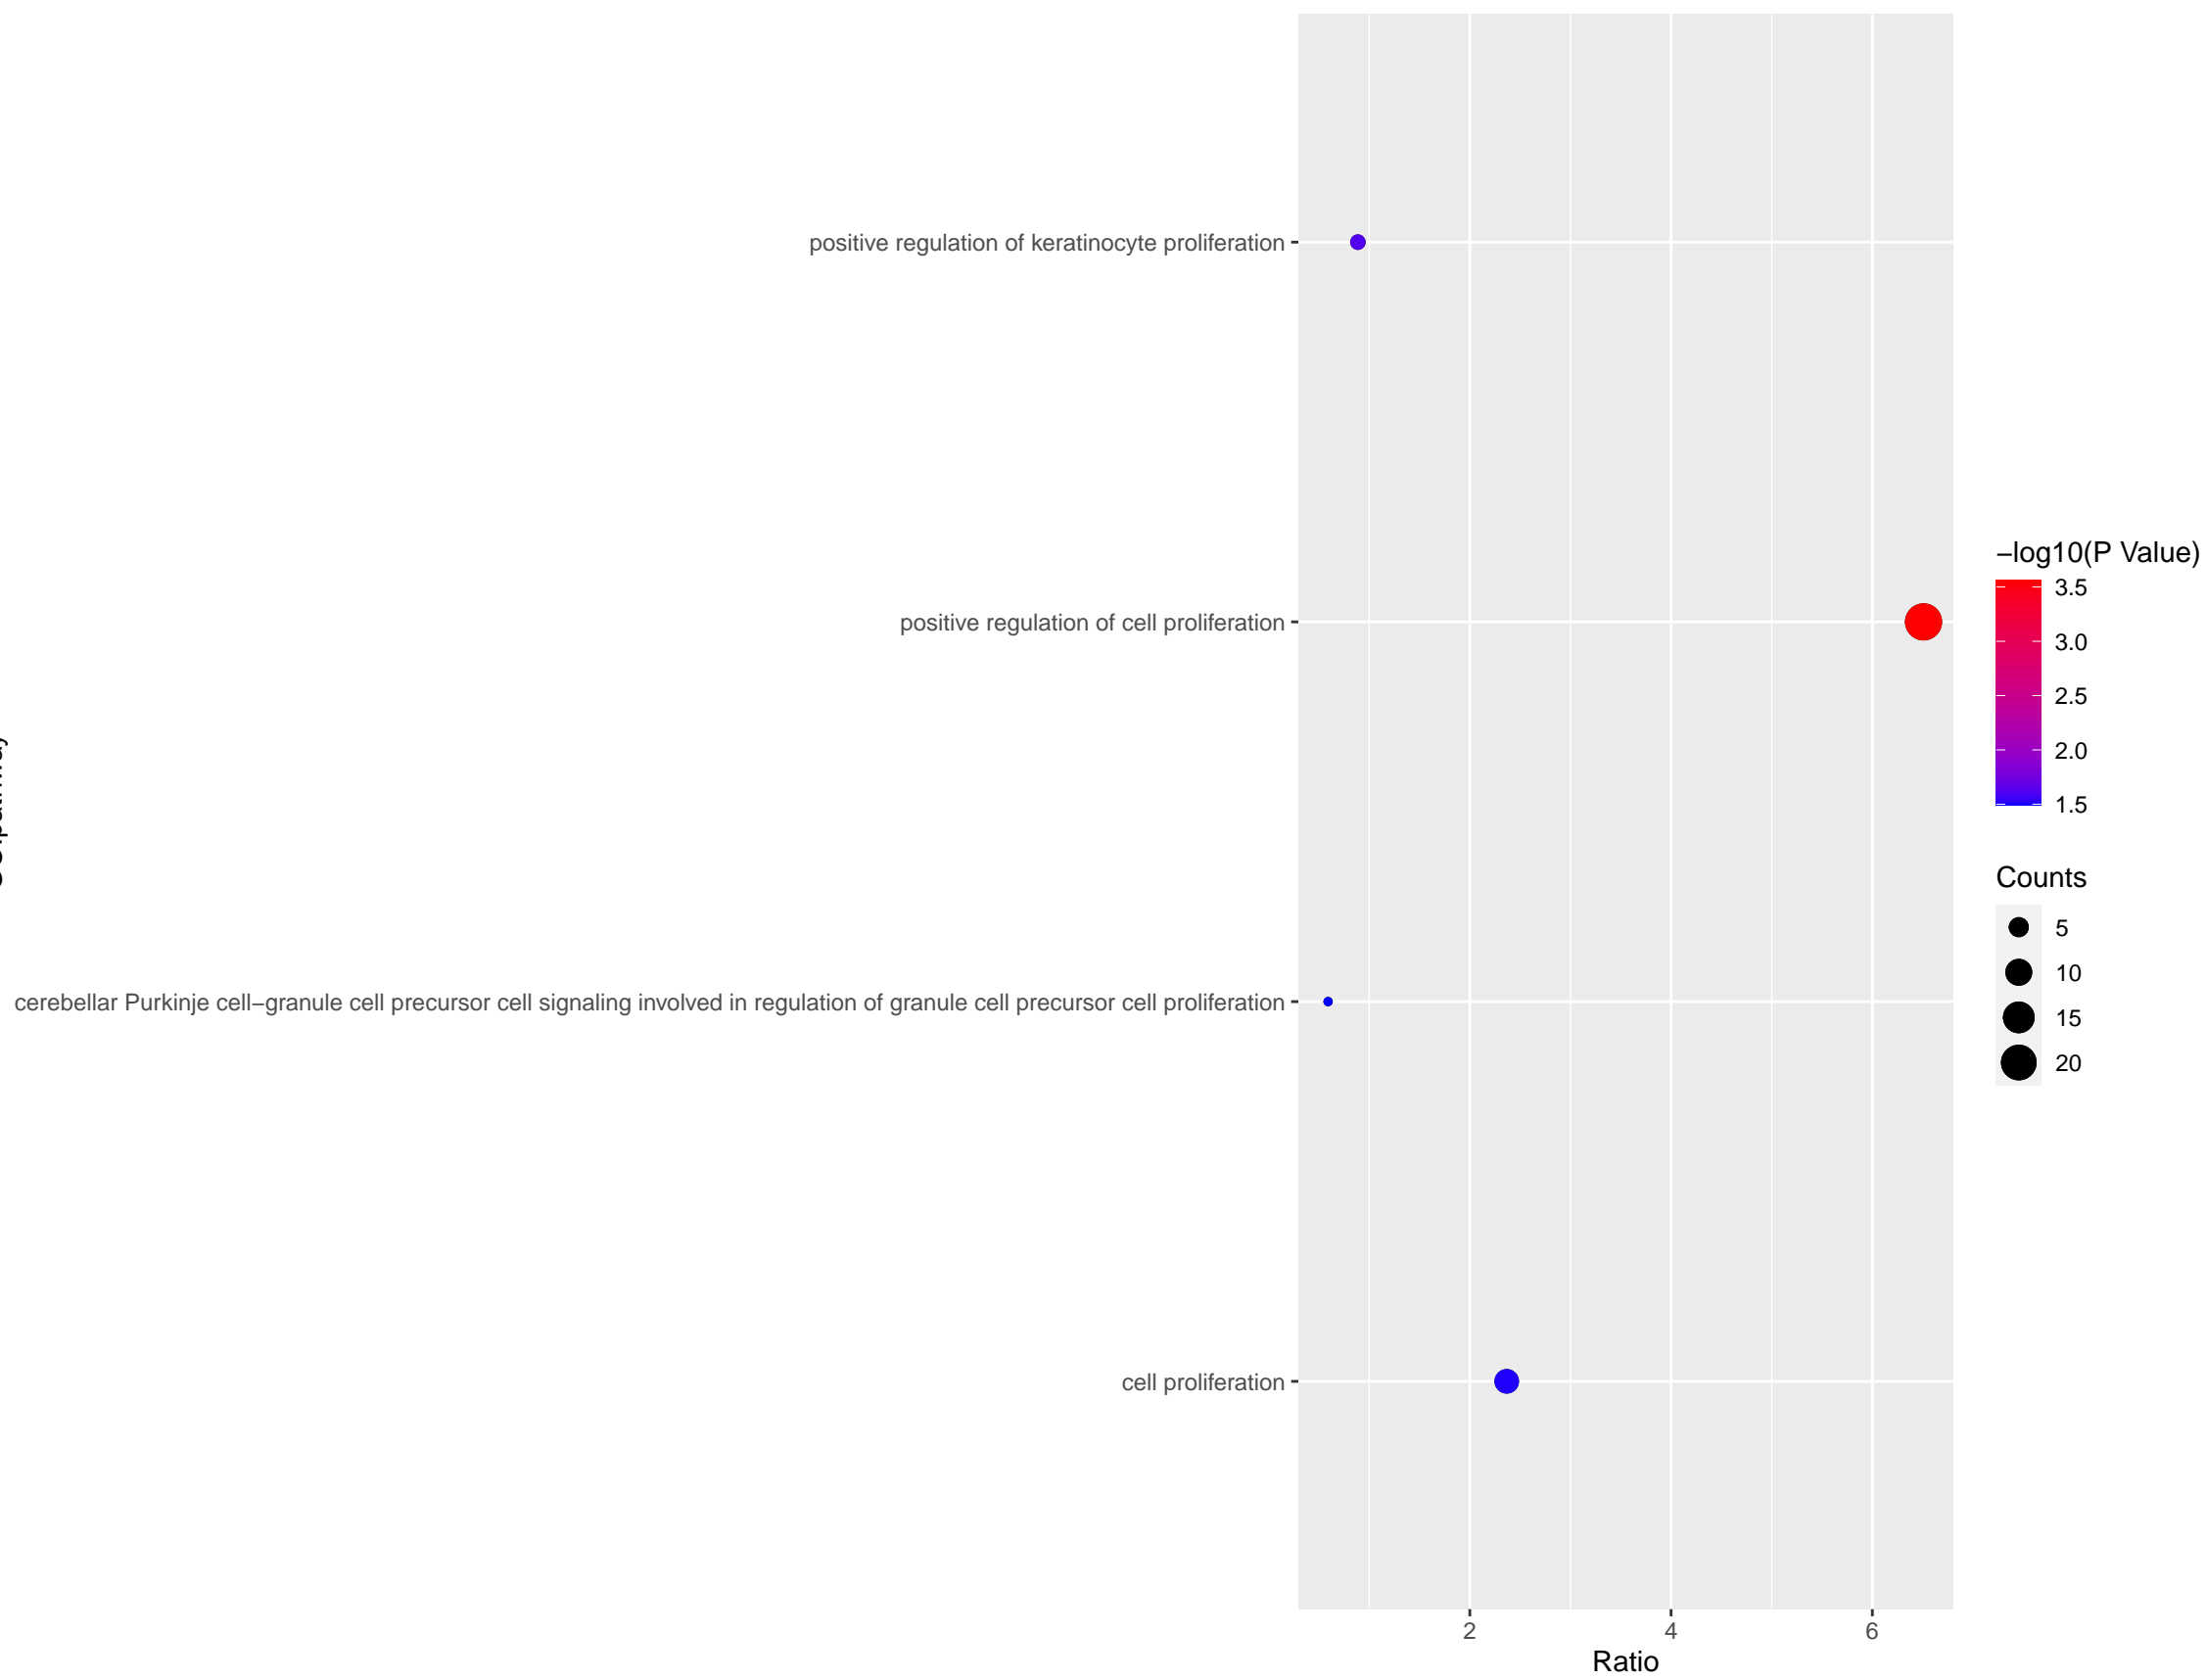

Supplement: Experimental_raw_data.zip [file Experimental_raw_data.zip]

Individuals – PCA

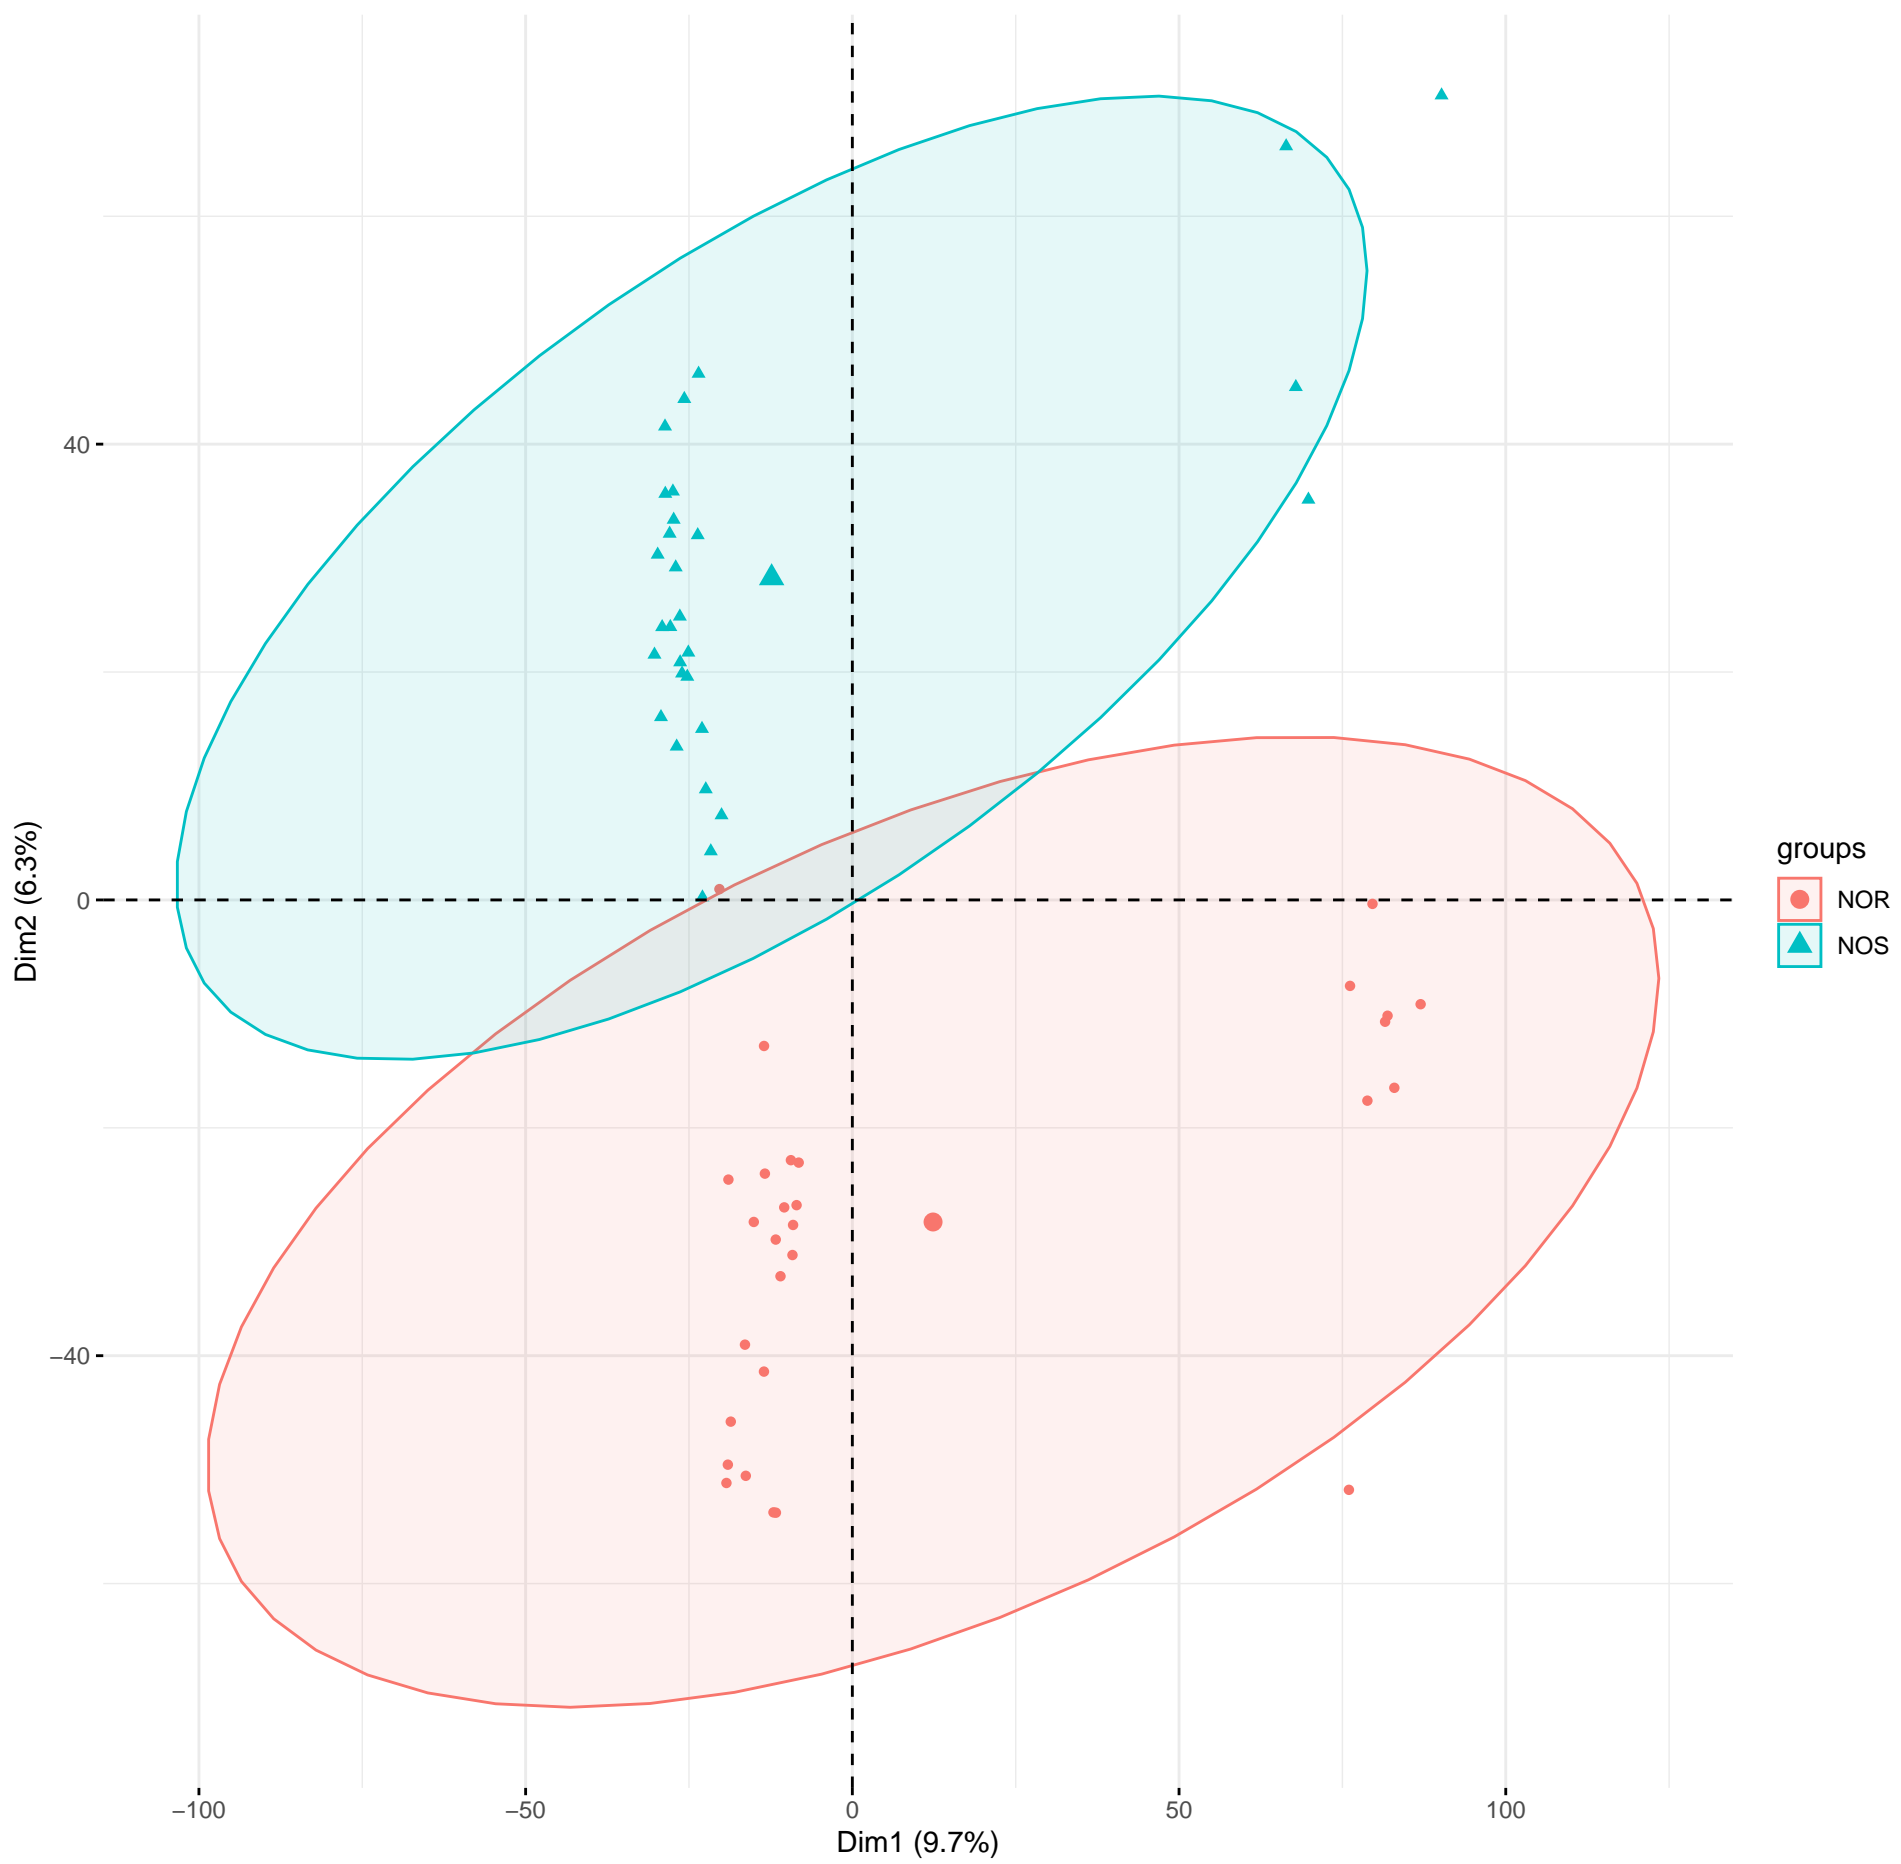

Supplement: Experimental_raw_data.zip [file Experimental_raw_data.zip]

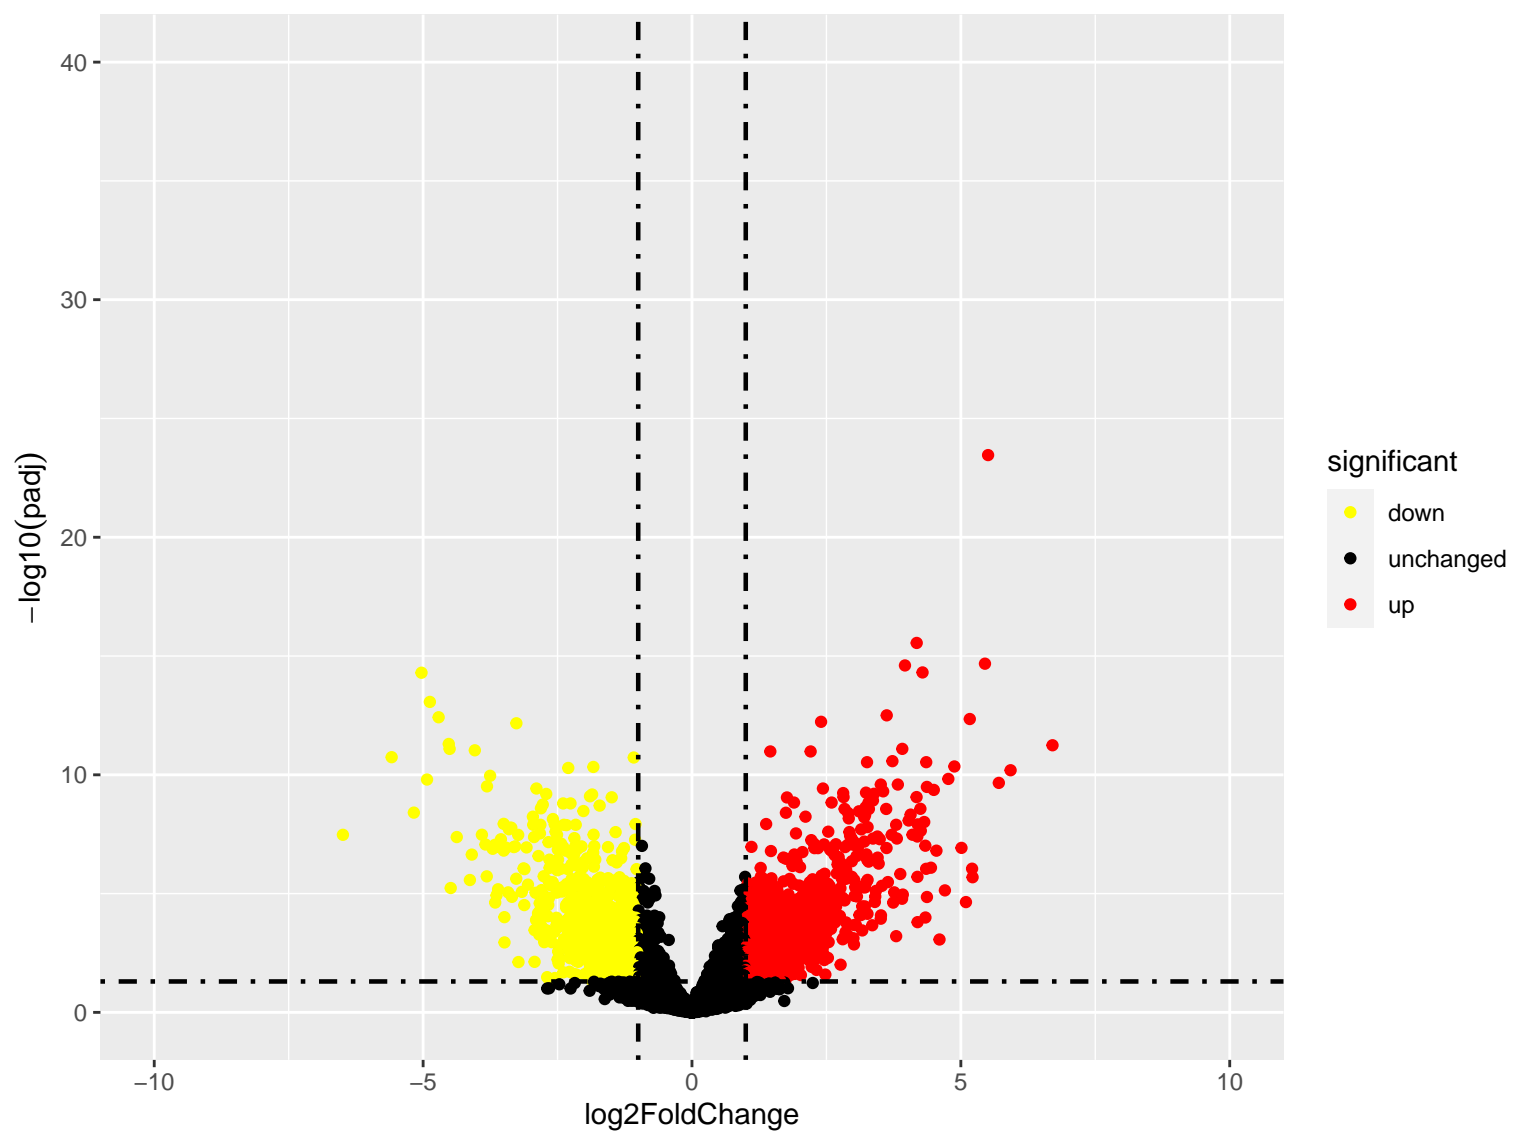

Supplement: Experimental_raw_data.zip [file Experimental_raw_data.zip]

Individuals – PCA

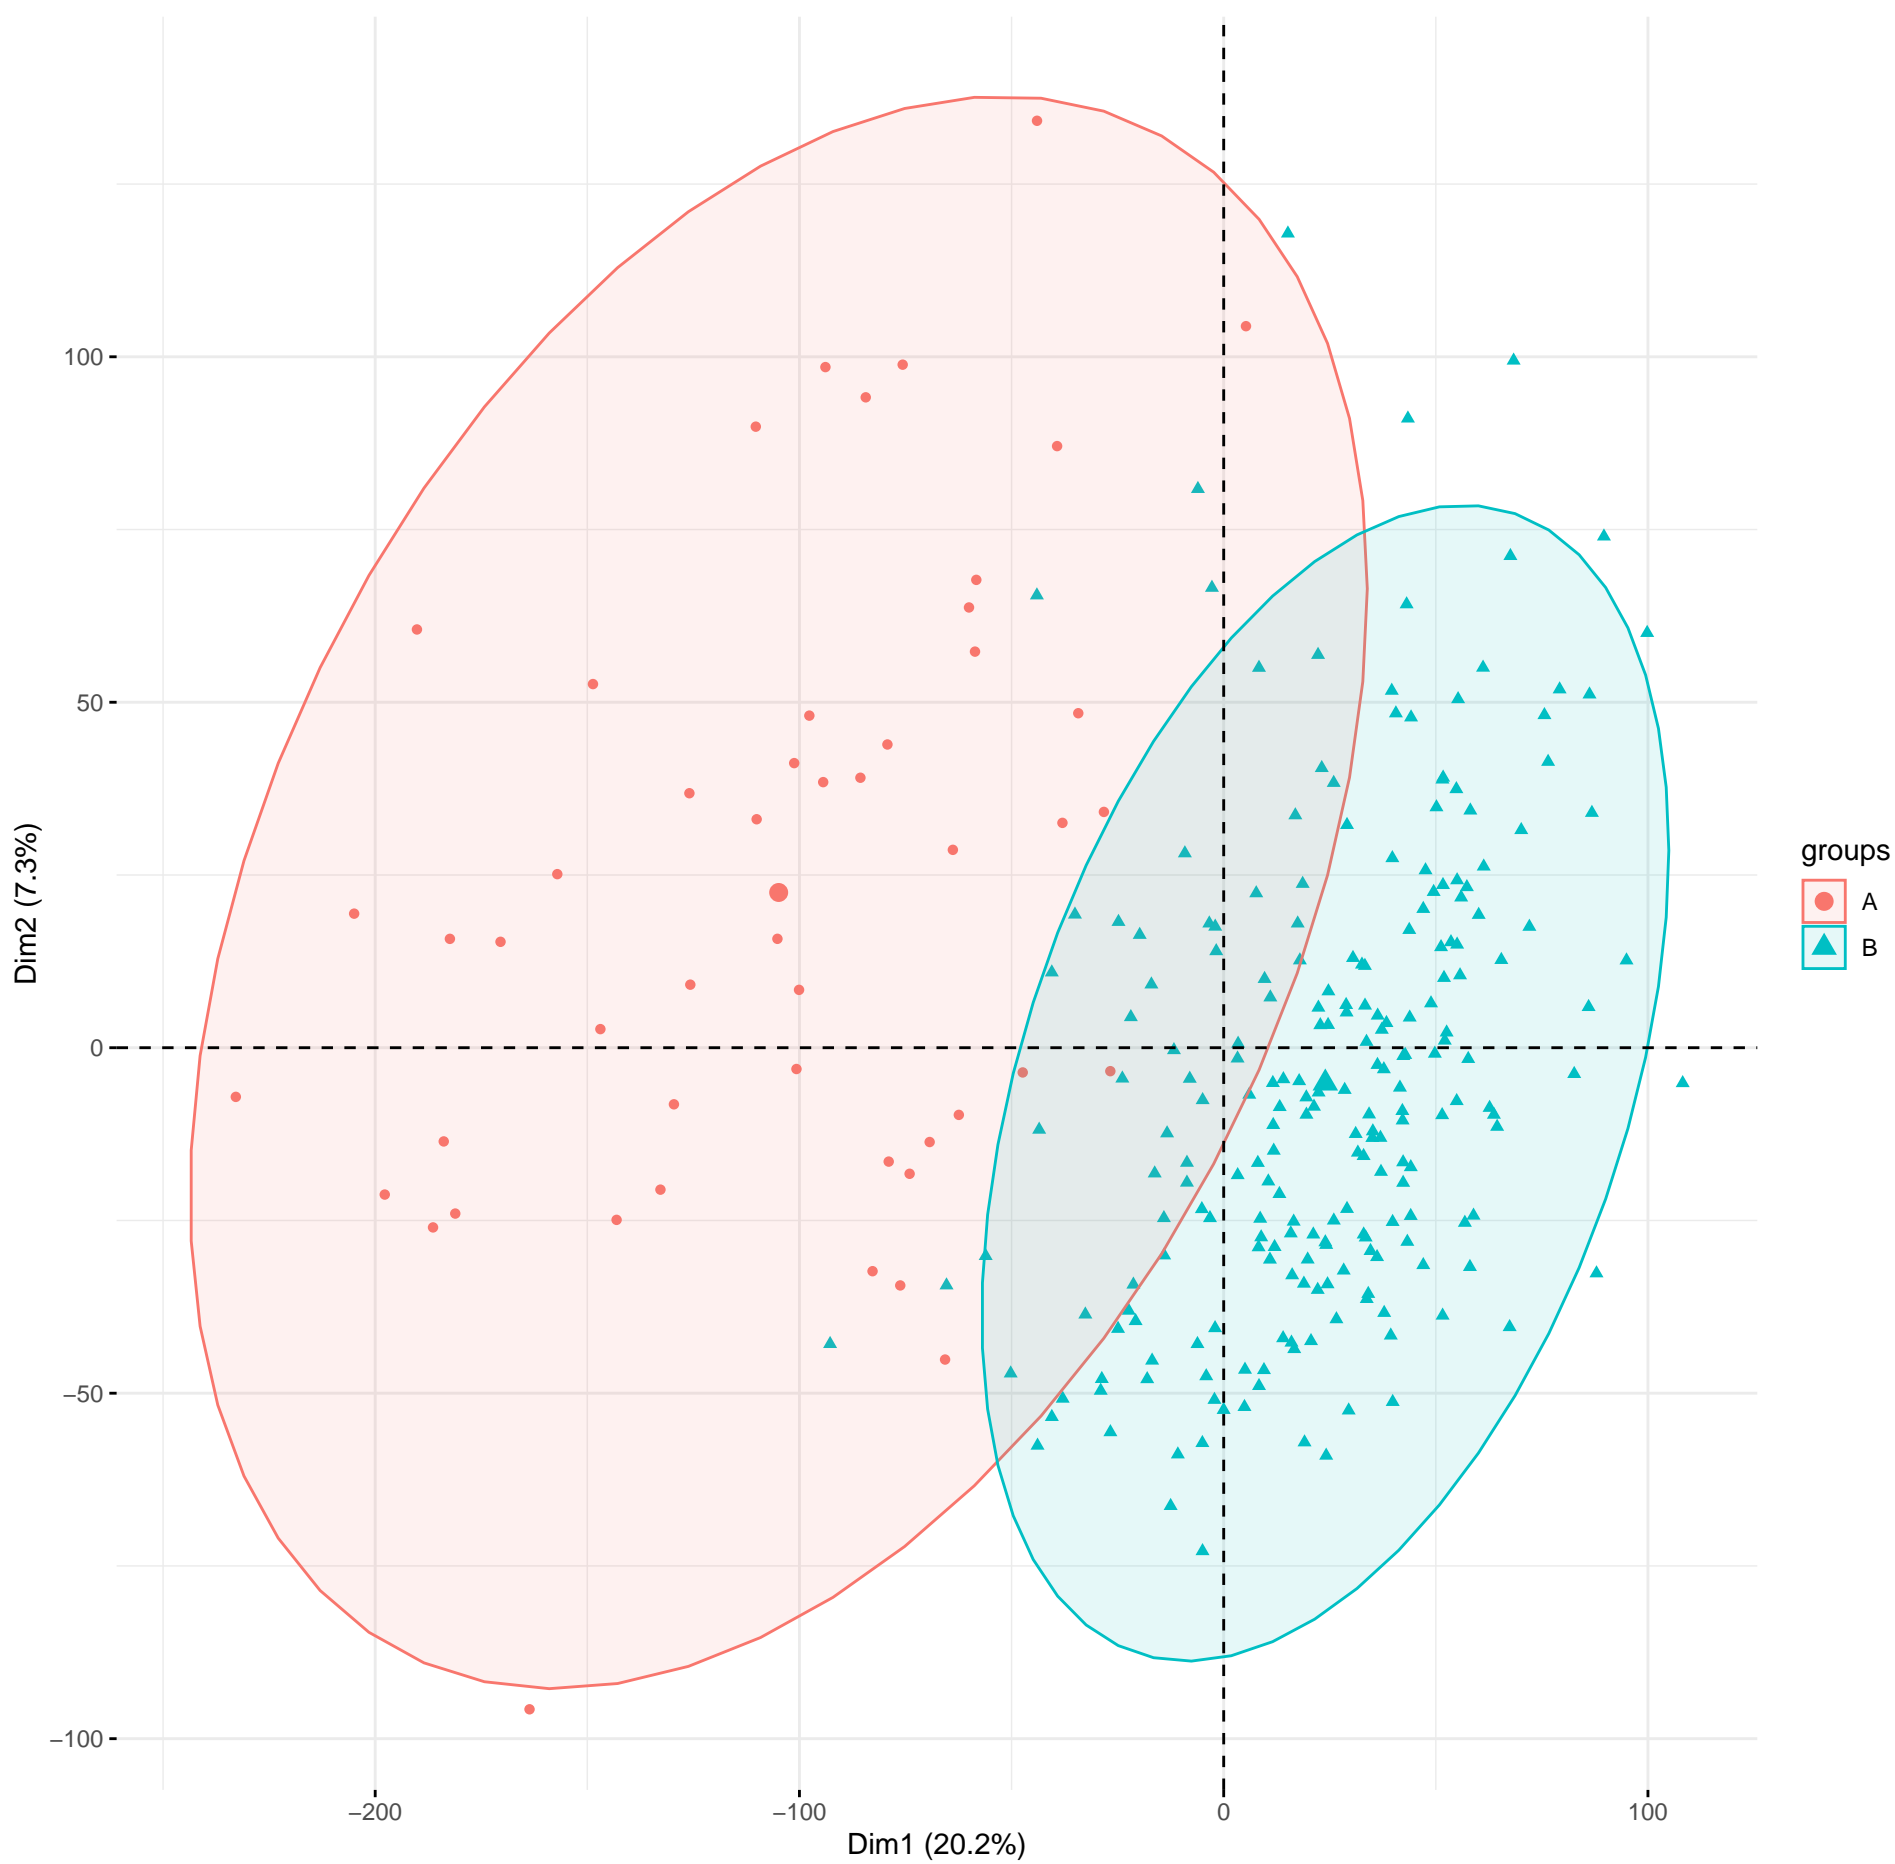

Supplement: Experimental_raw_data.zip [file Experimental_raw_data.zip]

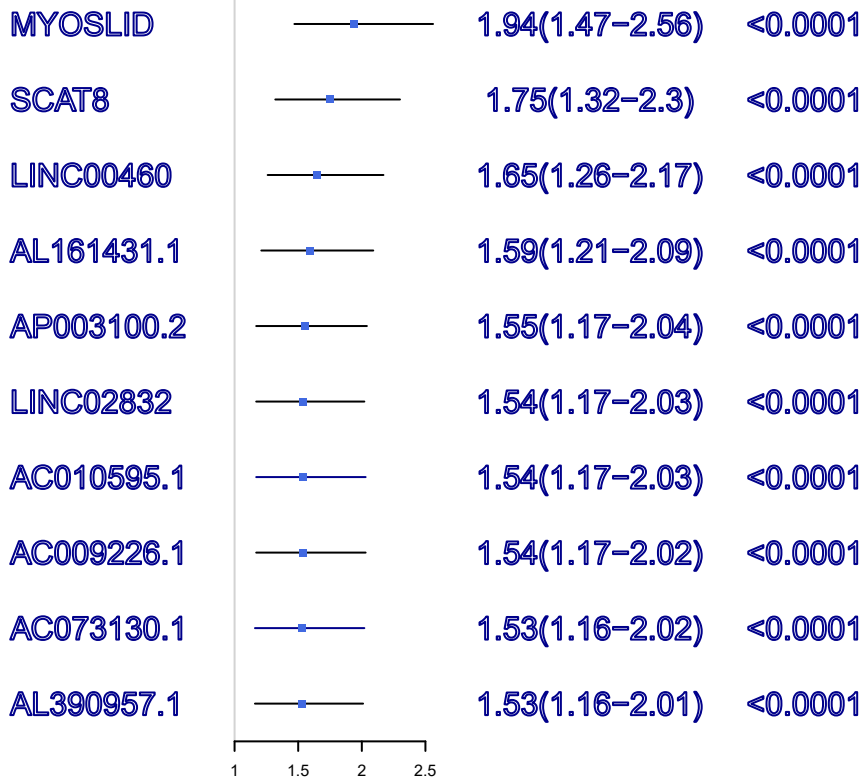

Supplement: Experimental_raw_data.zip [file Experimental_raw_data.zip]

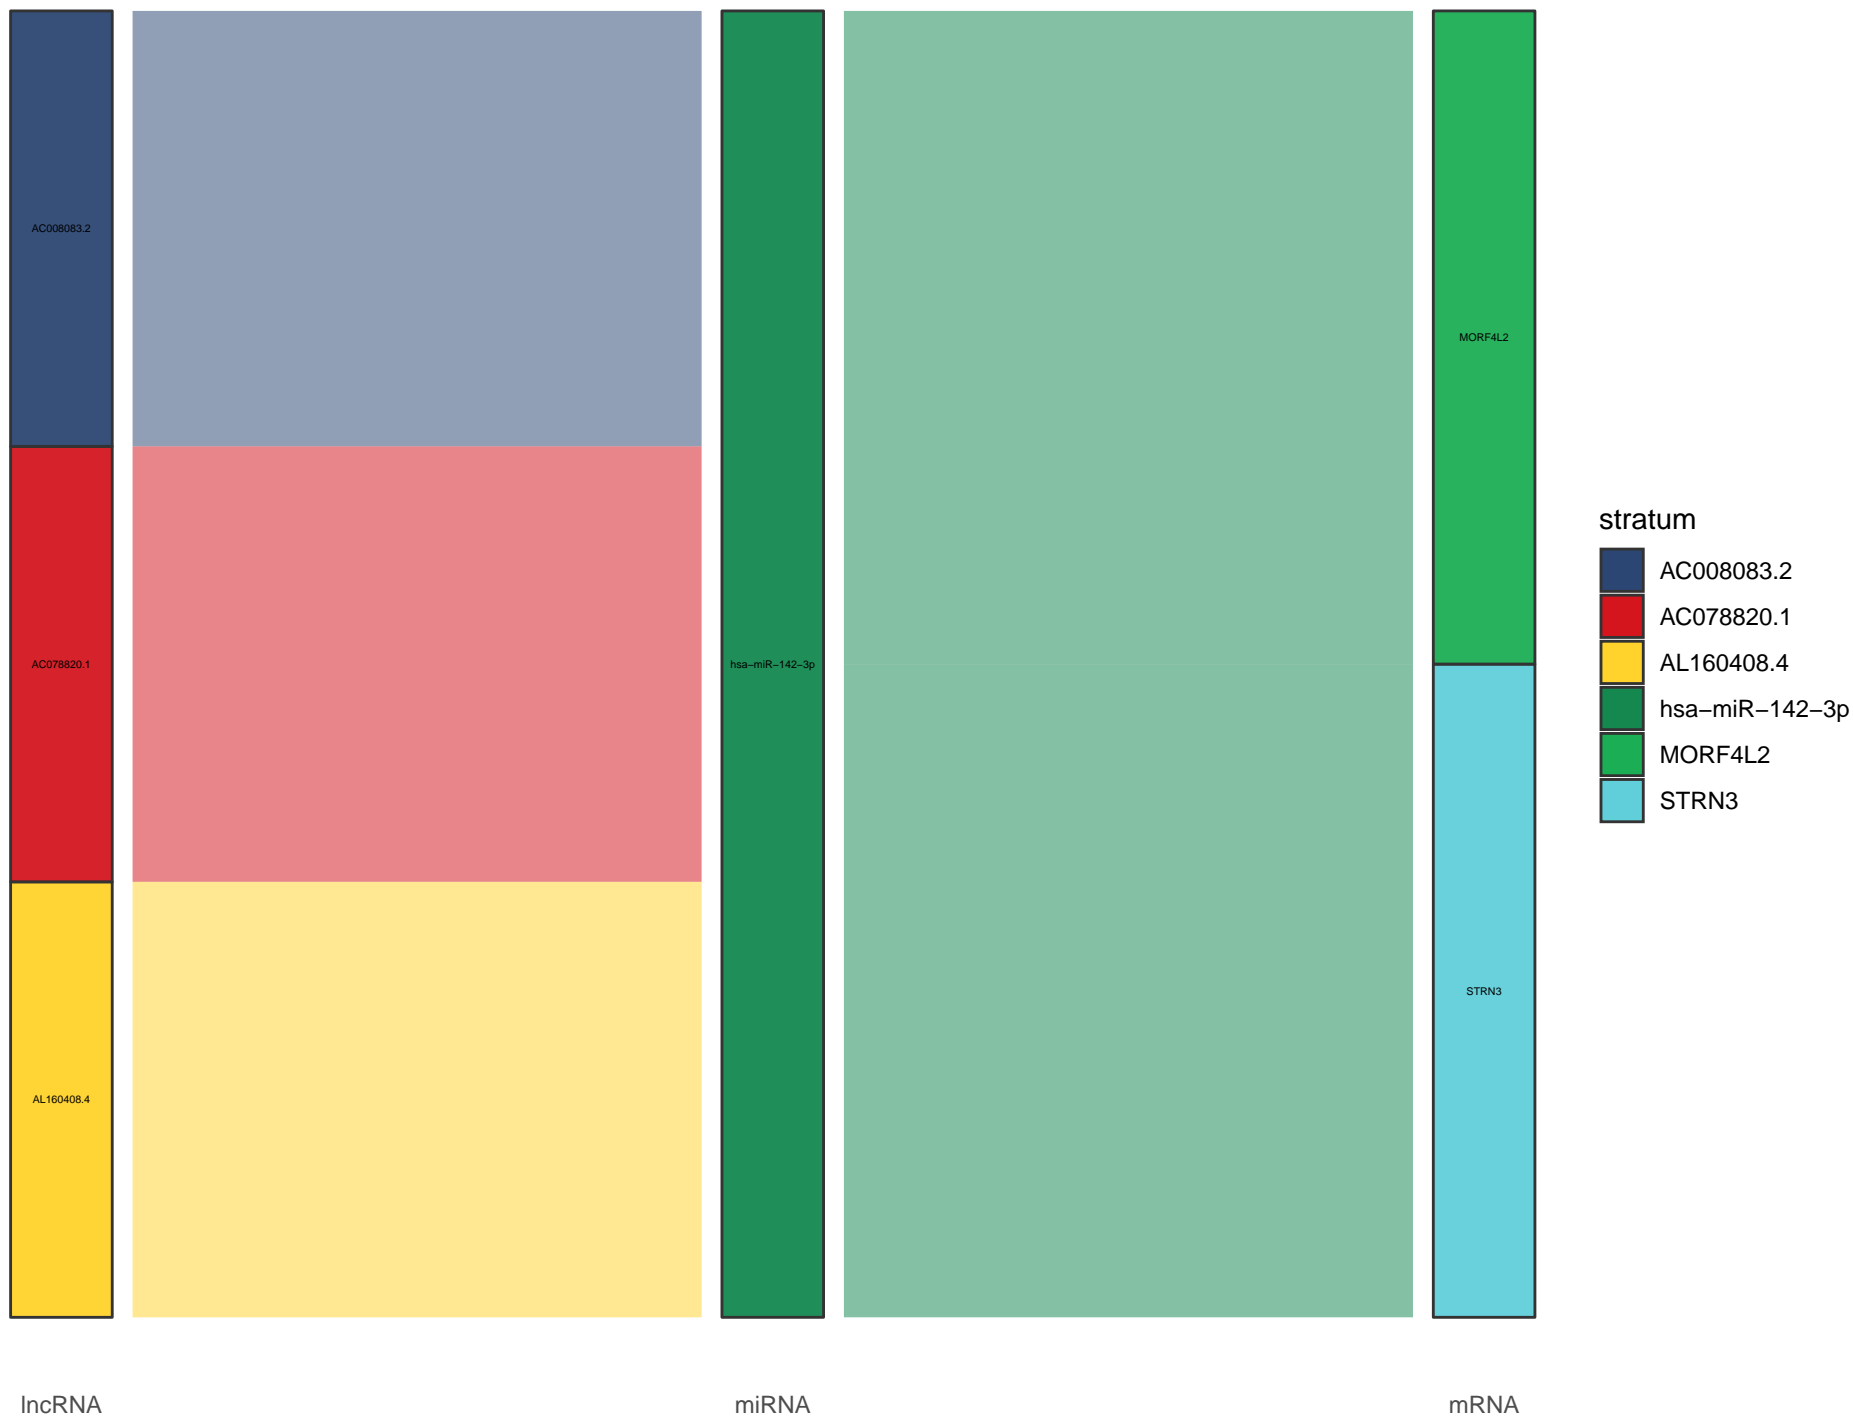

Supplement: Experimental_raw_data.zip [file Experimental_raw_data.zip]

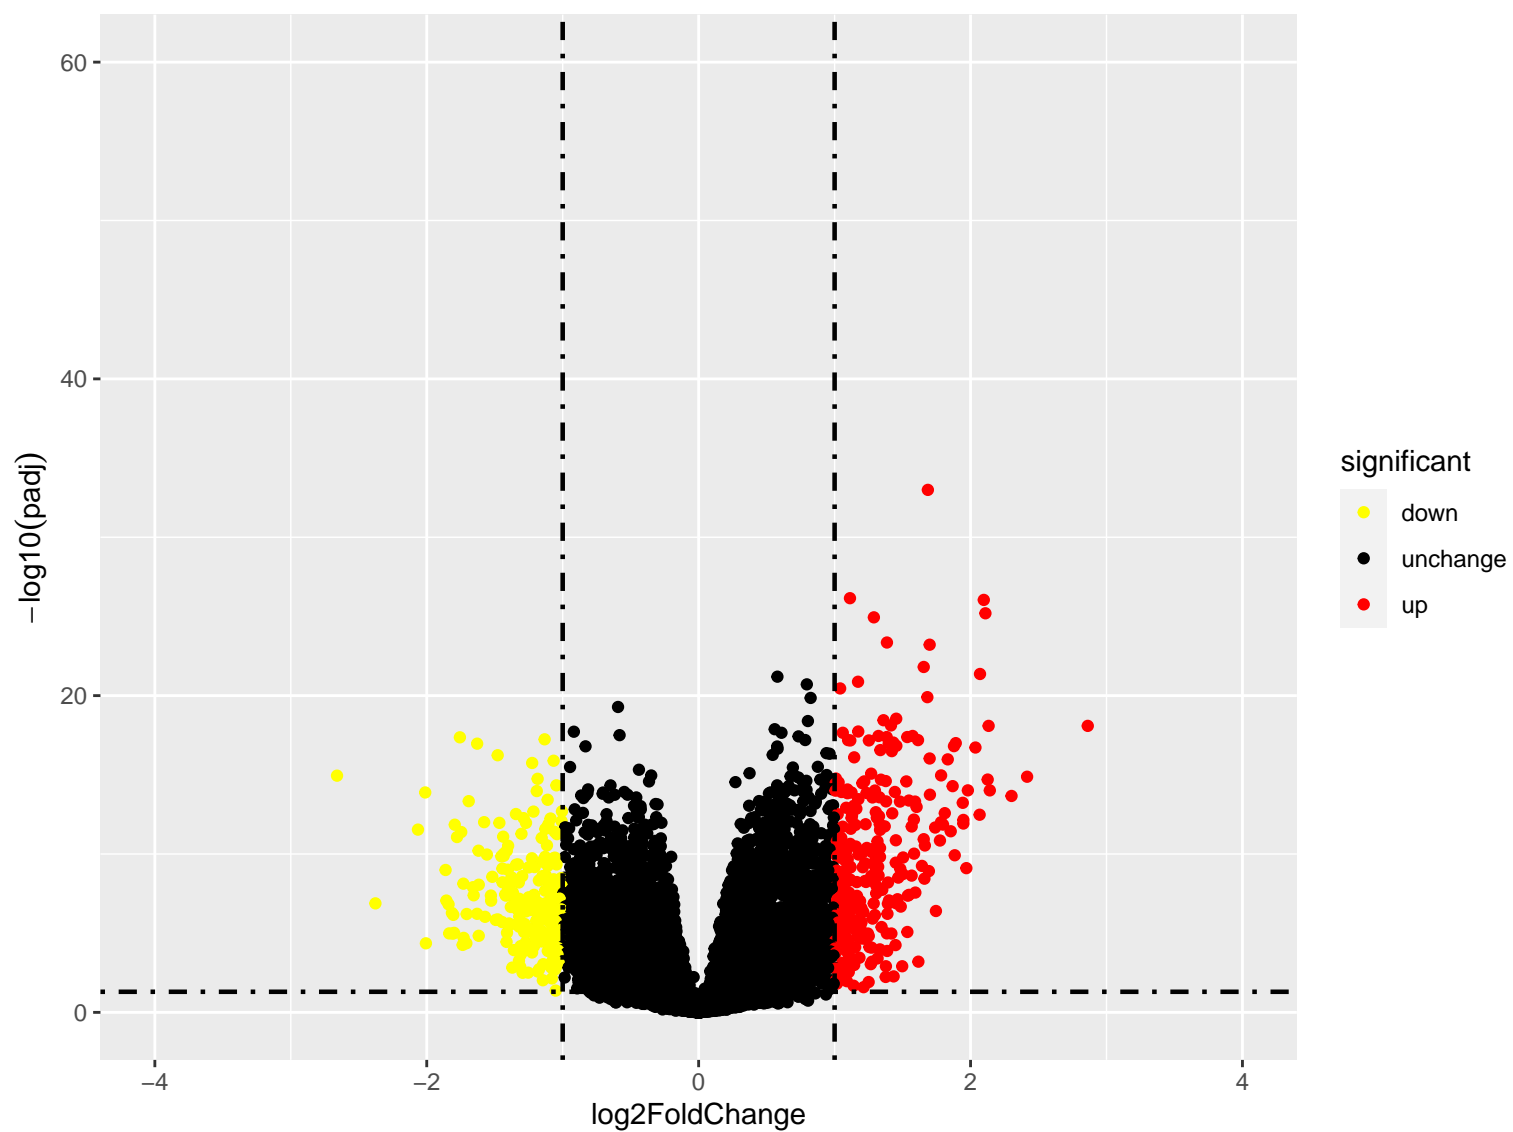

Supplement: Experimental_raw_data.zip [file Experimental_raw_data.zip]

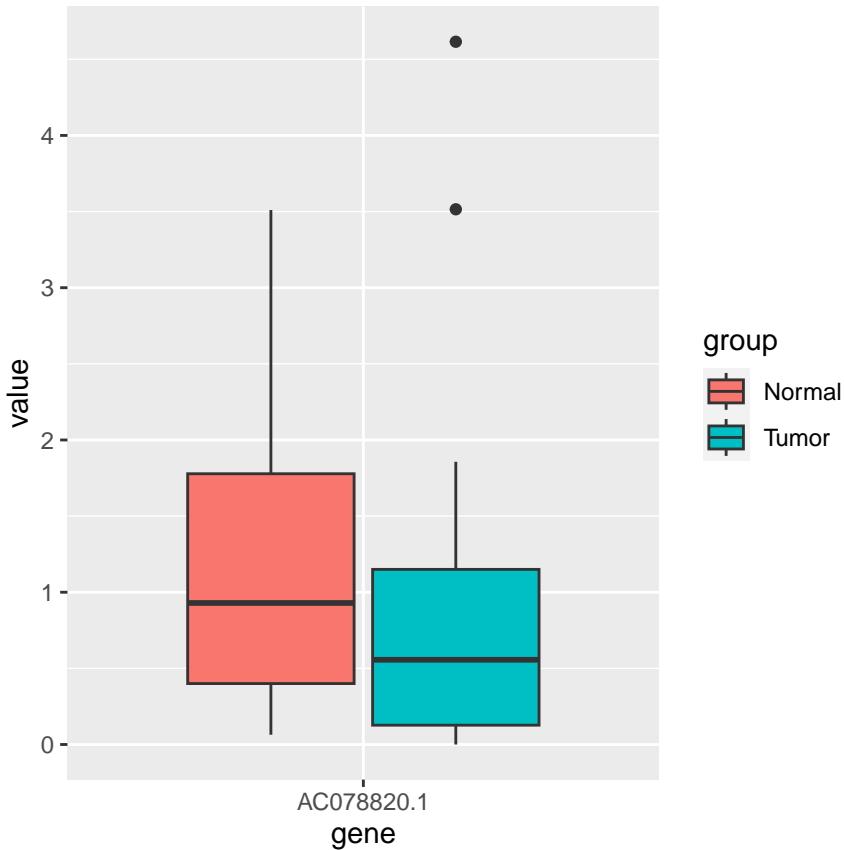

Supplement: Experimental_raw_data.zip [file Experimental_raw_data.zip]

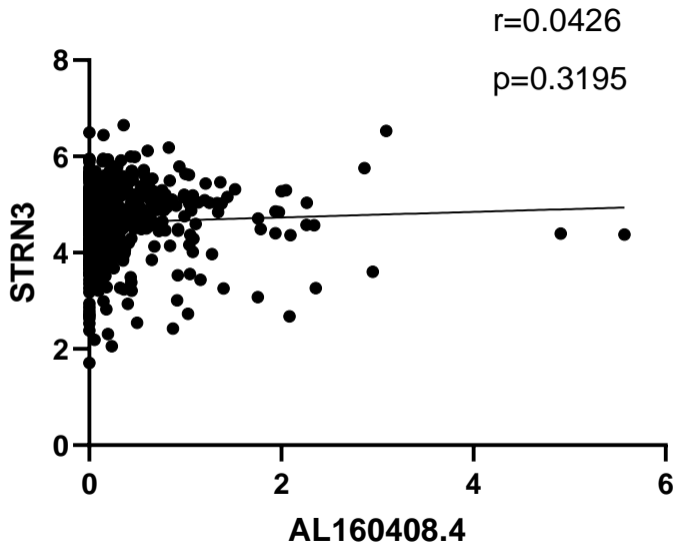

Supplement: Experimental_raw_data.zip [file Experimental_raw_data.zip]

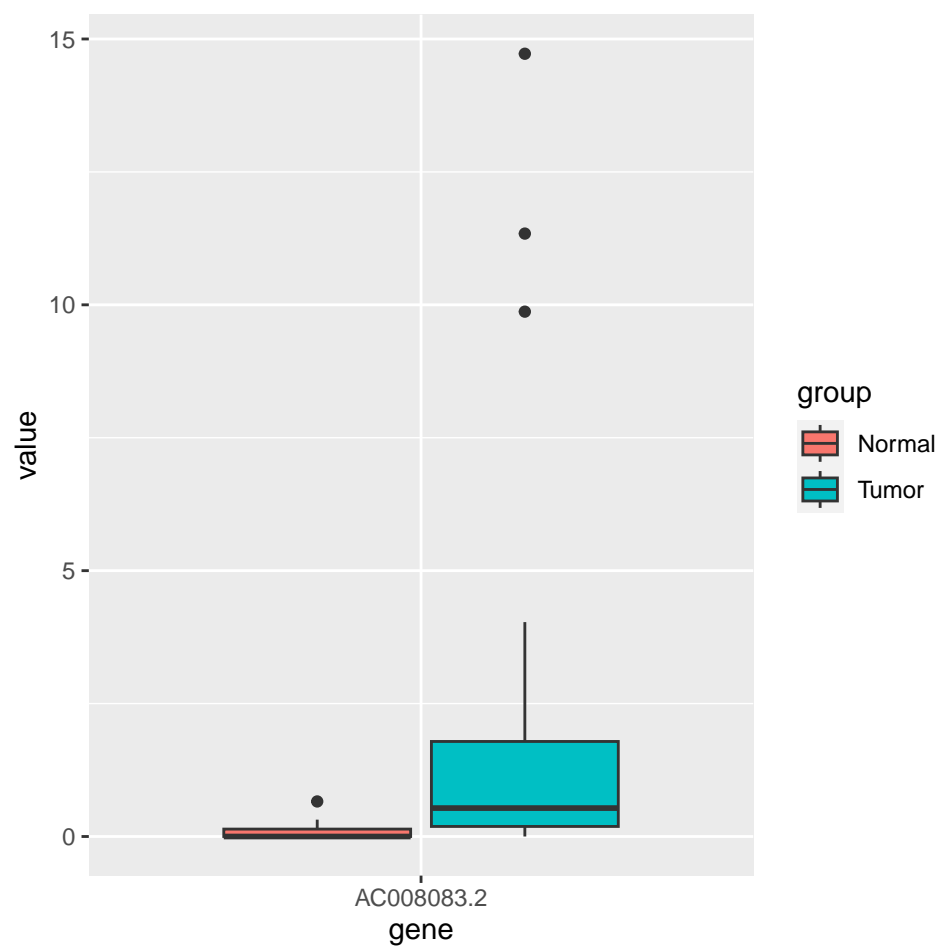

Supplement: Experimental_raw_data.zip [file Experimental_raw_data.zip]

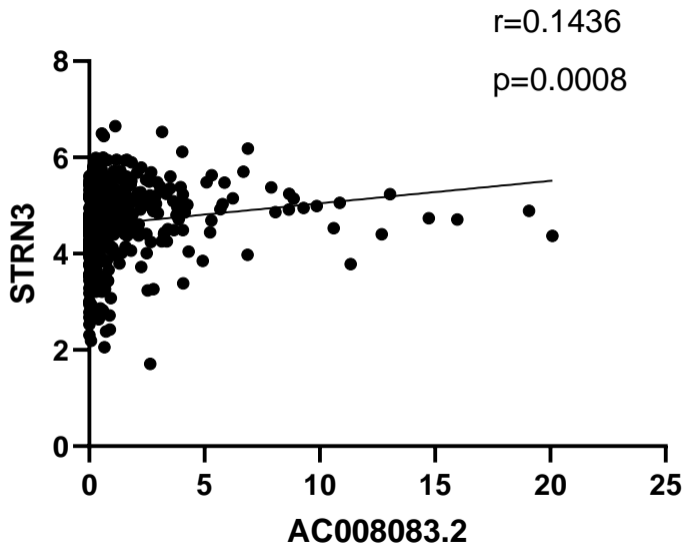

Supplement: Experimental_raw_data.zip [file Experimental_raw_data.zip]

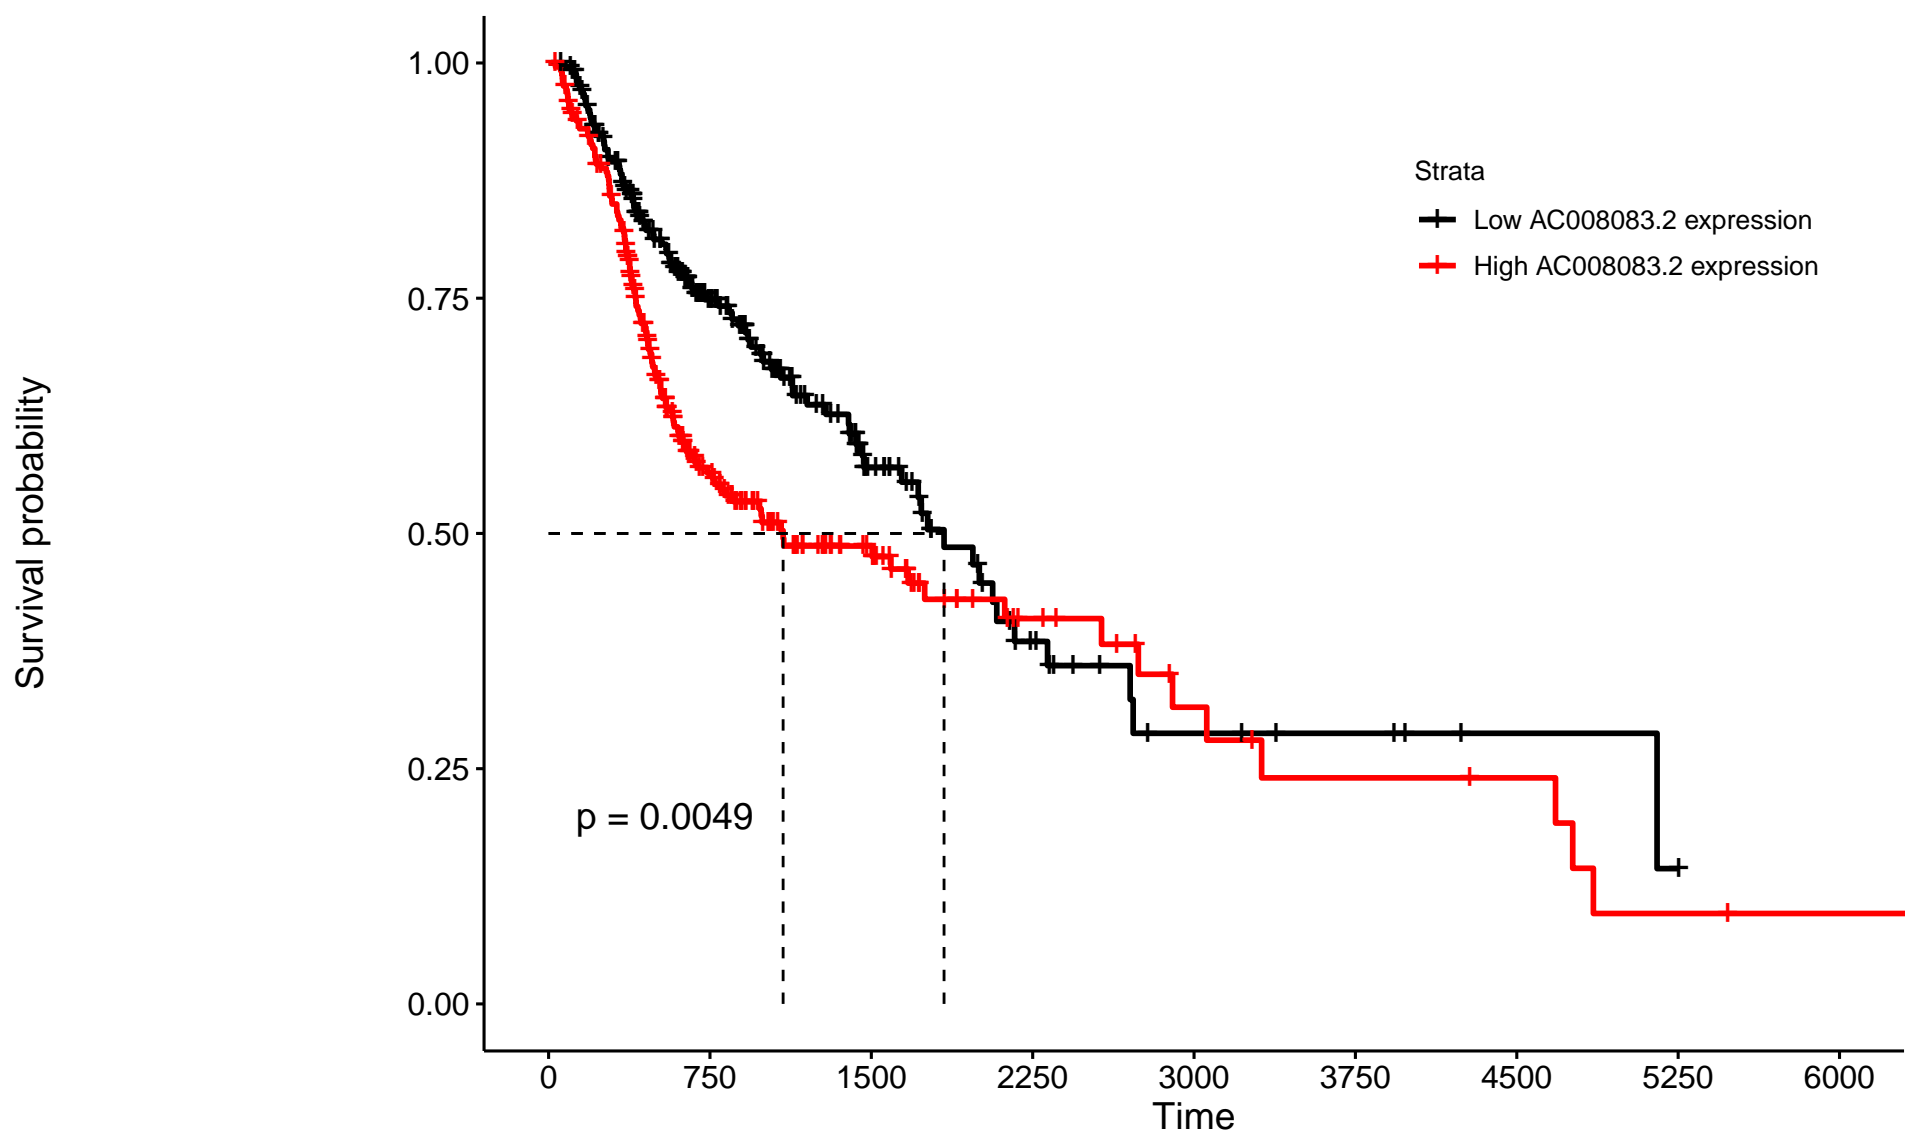

Number at risk

| Strata                     | 0   | 750 | 1500 | 2250 | 3000 | 3750 | 4500 | 5250 | 6000 |
|----------------------------|-----|-----|------|------|------|------|------|------|------|
| Low AC008083.2 expression  | 246 | 118 | 43   | 16   | 7    | 5    | 2    | 1    | 0    |
| High AC008083.2 expression | 246 | 97  | 43   | 17   | 9    | 6    | 5    | 2    | 1    |

Time

Supplement: Experimental_raw_data.zip [file Experimental_raw_data.zip]

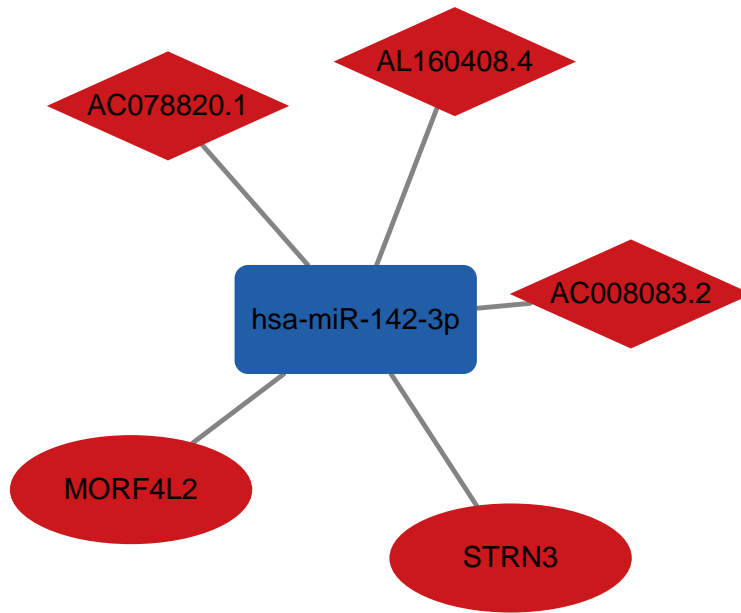

Supplement: Experimental_raw_data.zip [file Experimental_raw_data.zip]

lncRNA\_down

miRNA\_up

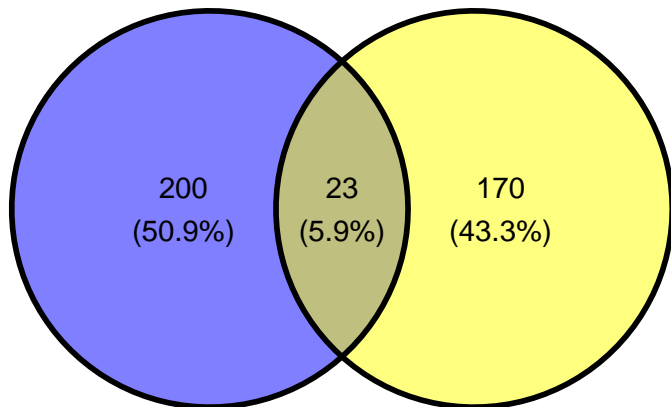

Supplement: Experimental_raw_data.zip [file Experimental_raw_data.zip]

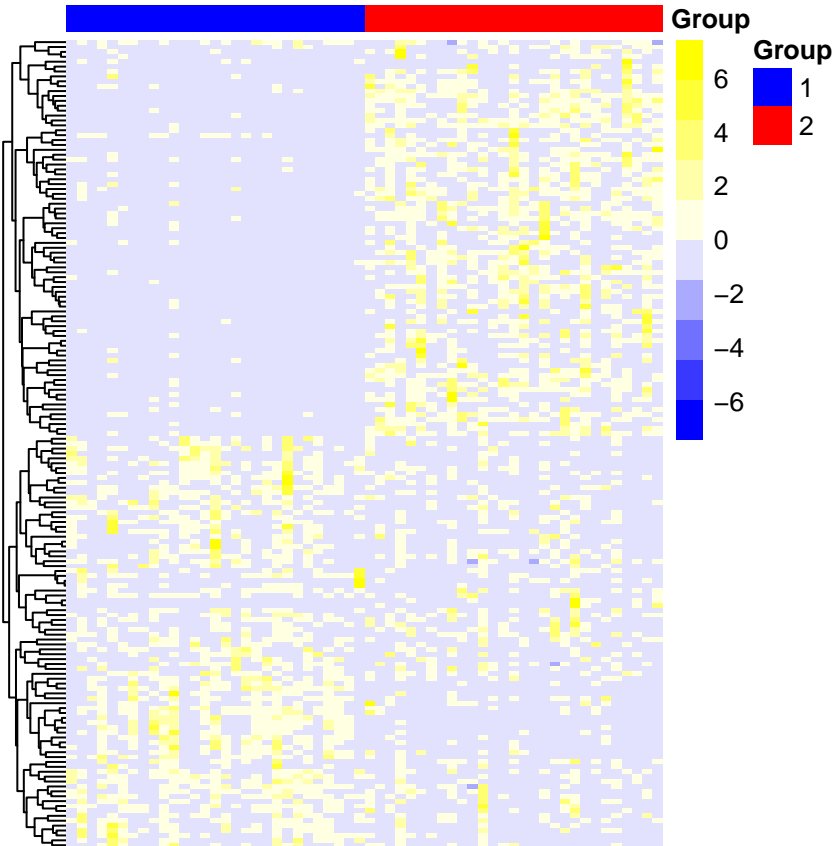

Supplement: Experimental_raw_data.zip [file Experimental_raw_data.zip]

GO.pathway

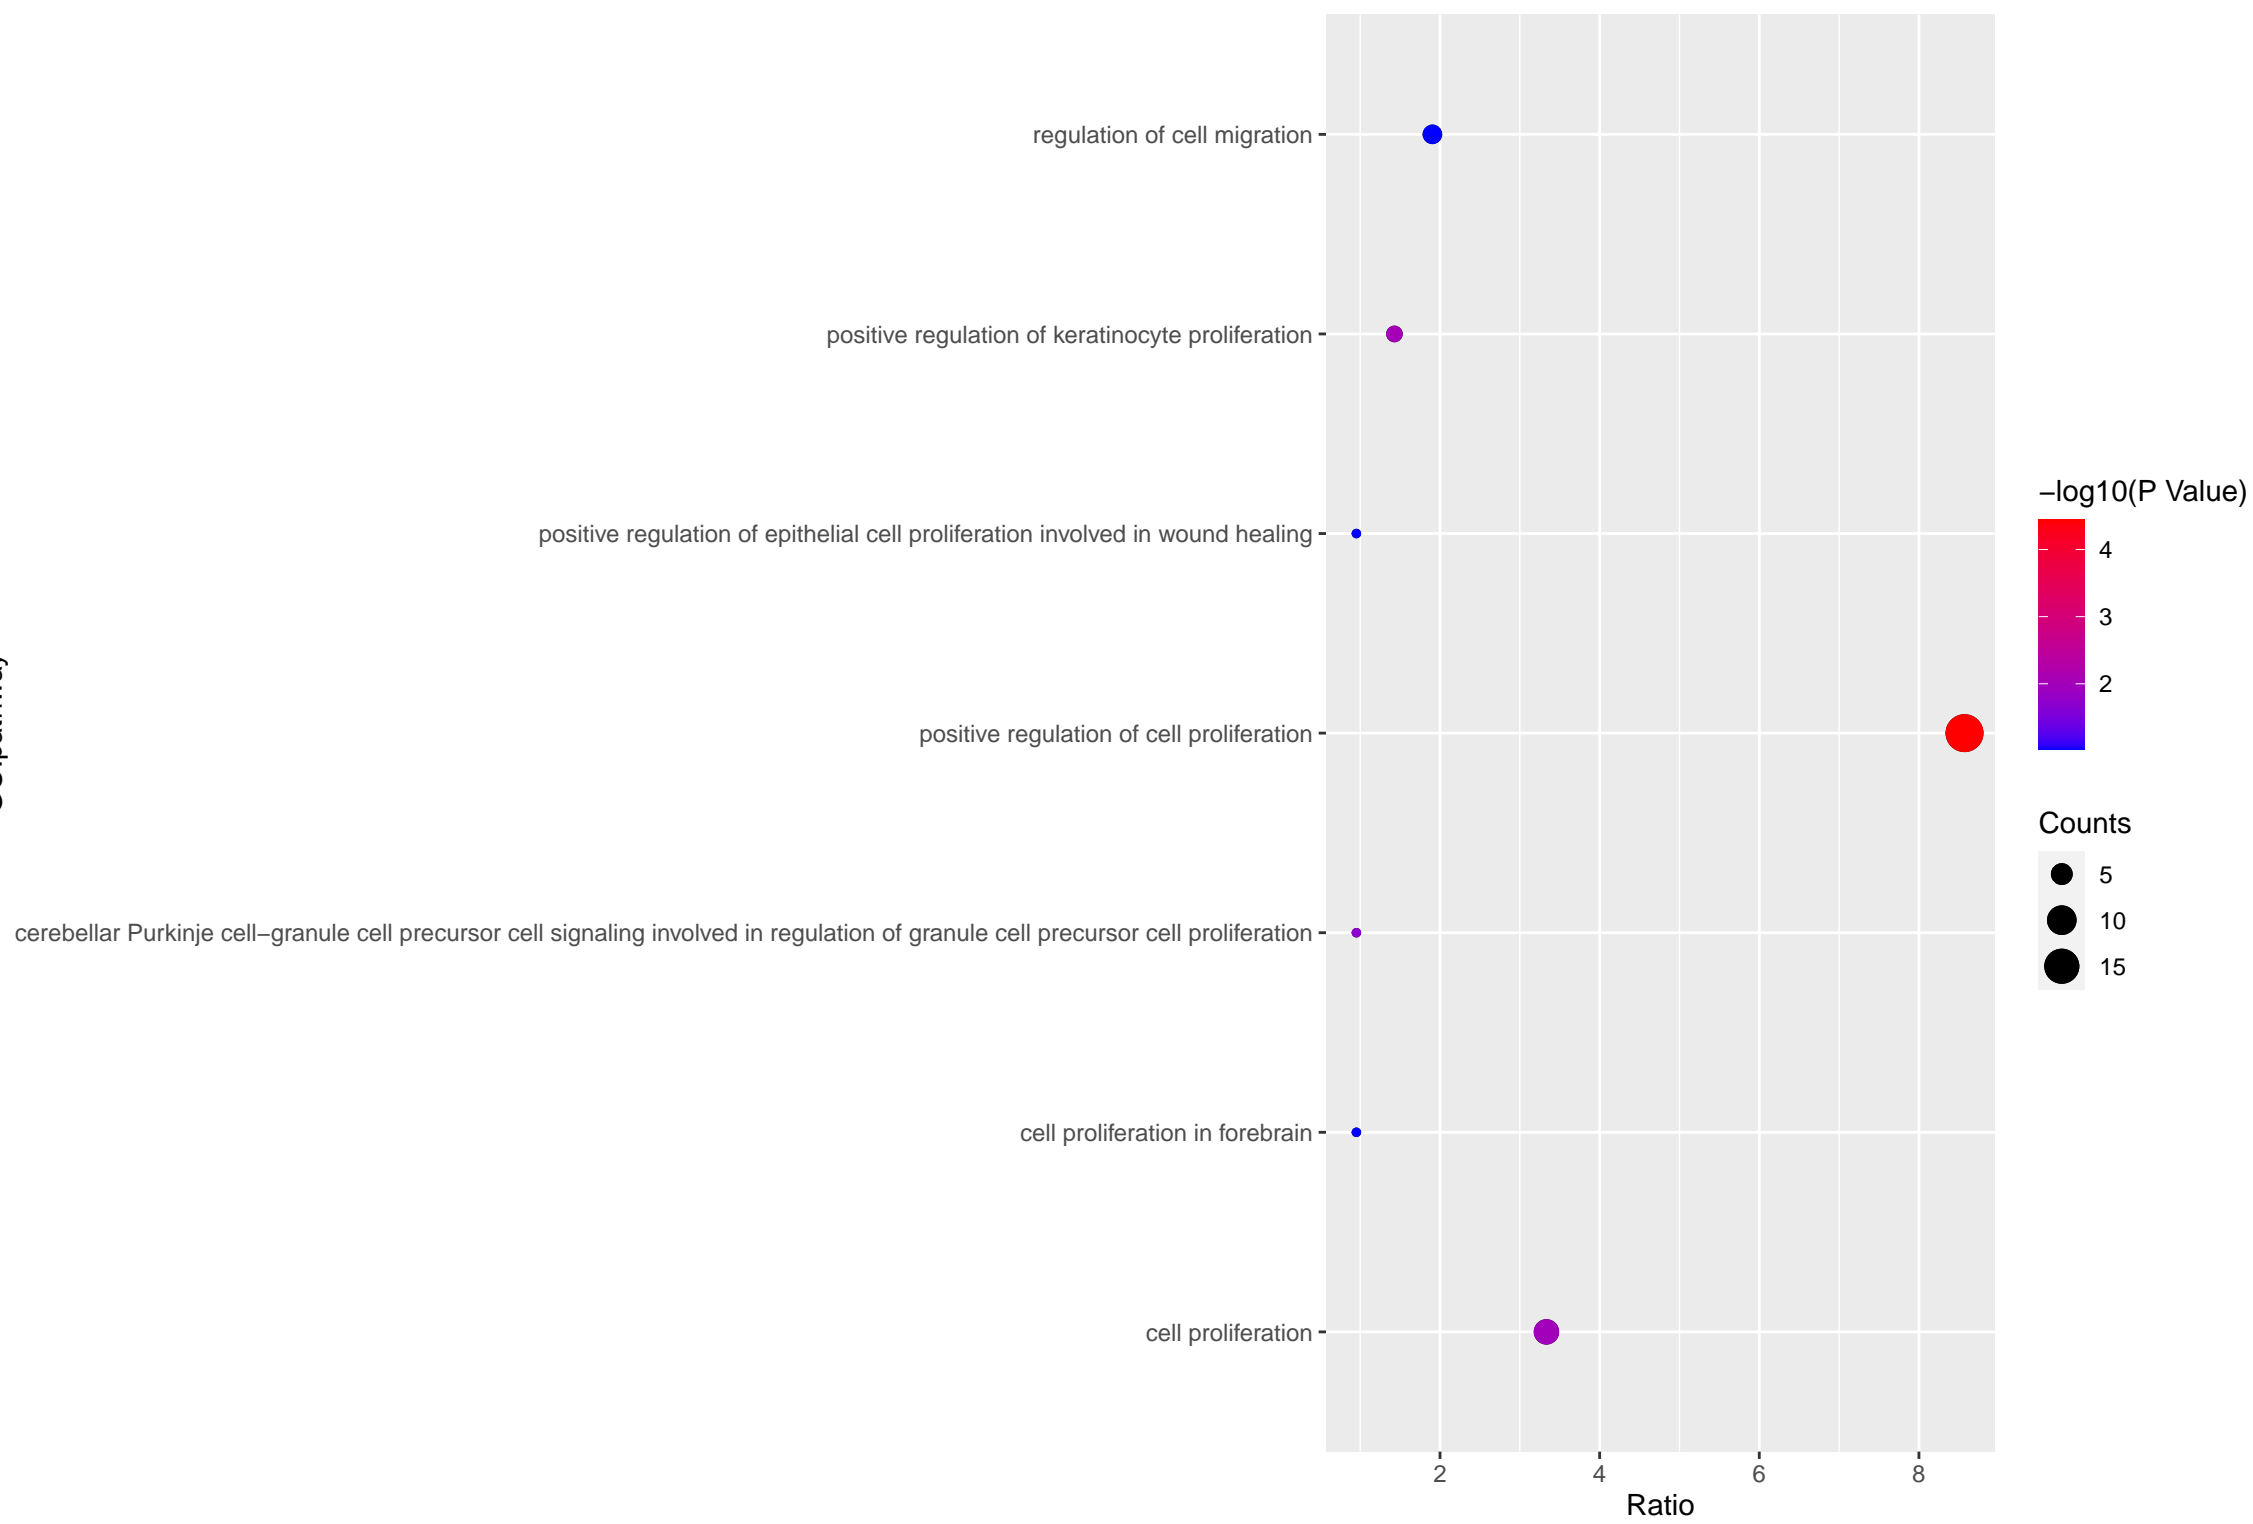

Supplement: Experimental_raw_data.zip [file Experimental_raw_data.zip]

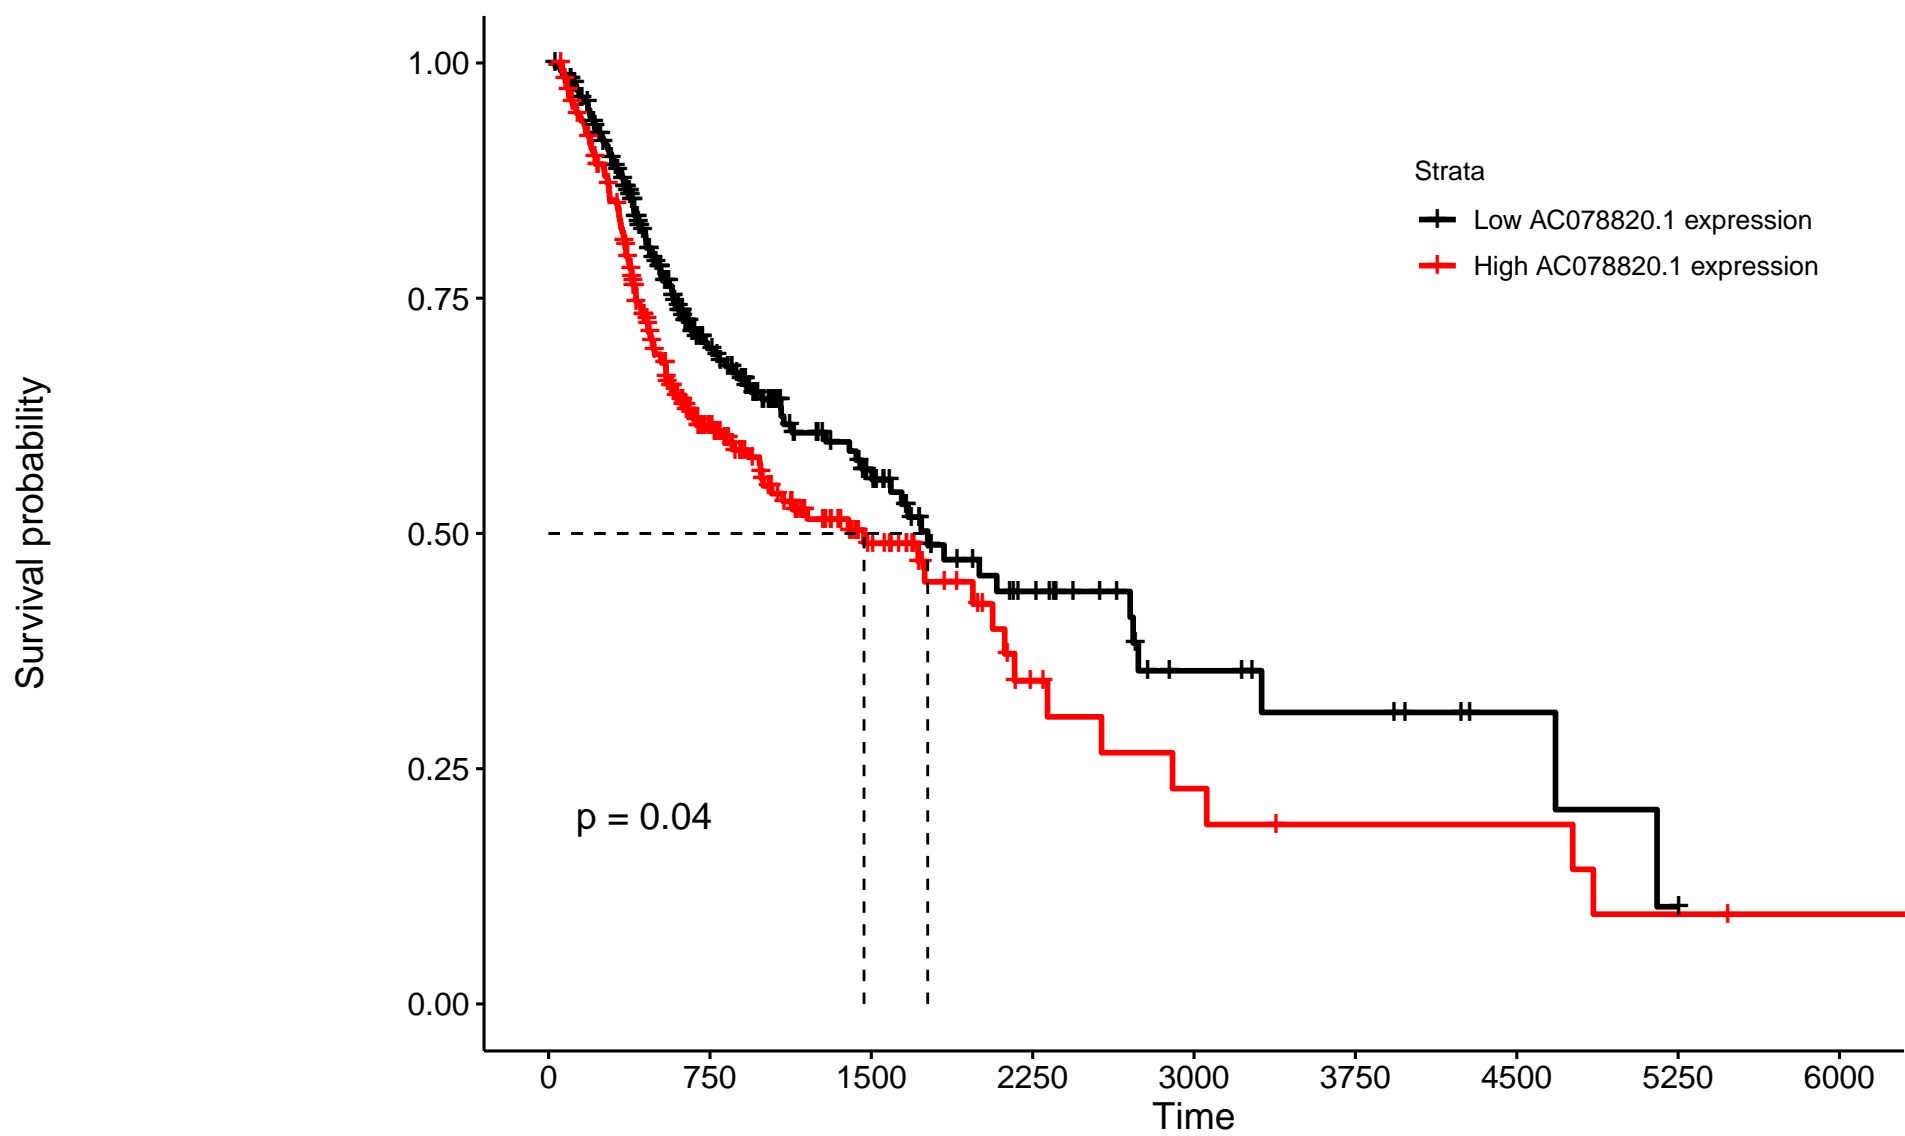

Number at risk

|                            |     |     |      |      |      |      |      |      |      |
|----------------------------|-----|-----|------|------|------|------|------|------|------|
| Strata                     | 0   | 750 | 1500 | 2250 | 3000 | 3750 | 4500 | 5250 | 6000 |
| Low AC078820.1 expression  | 246 | 113 | 52   | 23   | 10   | 7    | 3    | 1    | 0    |
| High AC078820.1 expression | 246 | 102 | 34   | 10   | 6    | 4    | 4    | 2    | 1    |

Time

Supplement: Experimental_raw_data.zip [file Experimental_raw_data.zip]

mRNA\_down    lncRNA\_down

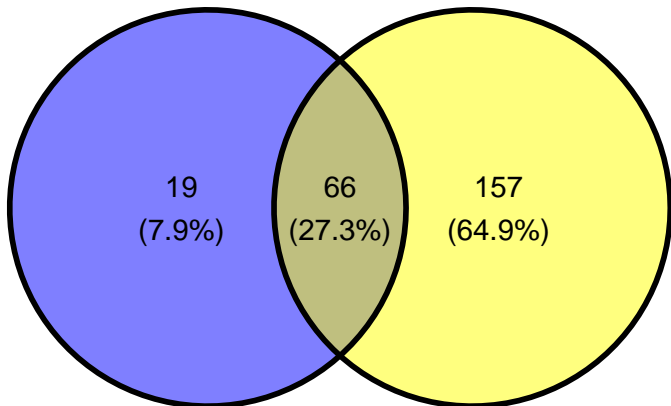

Supplement: Experimental_raw_data.zip [file Experimental_raw_data.zip]

STRN3

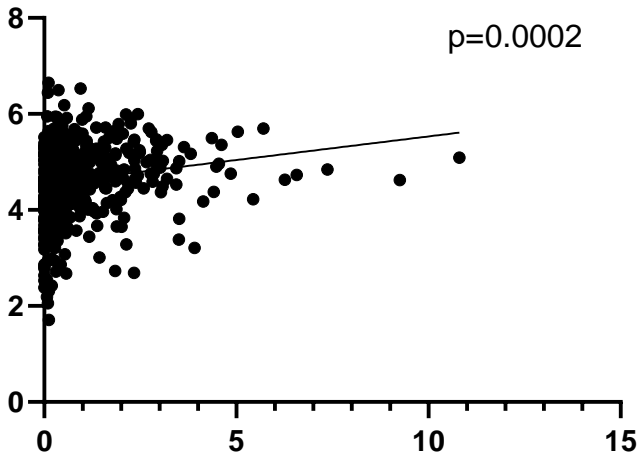

Supplement: Experimental_raw_data.zip [file Experimental_raw_data.zip]

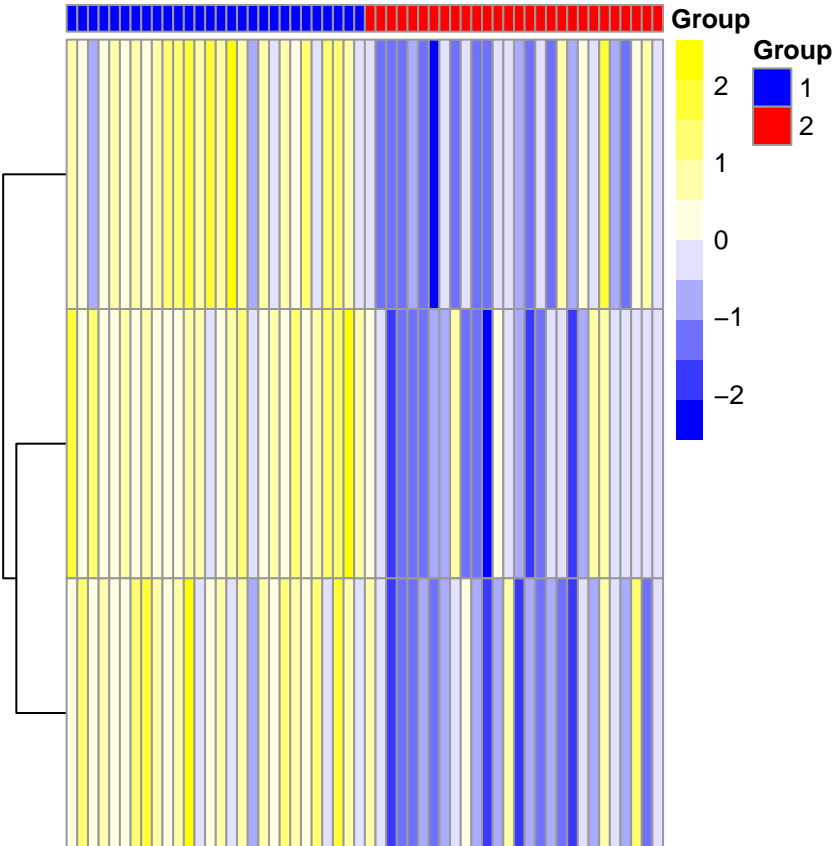

Supplement: Experimental_raw_data.zip [file Experimental_raw_data.zip]

Individuals – PCA

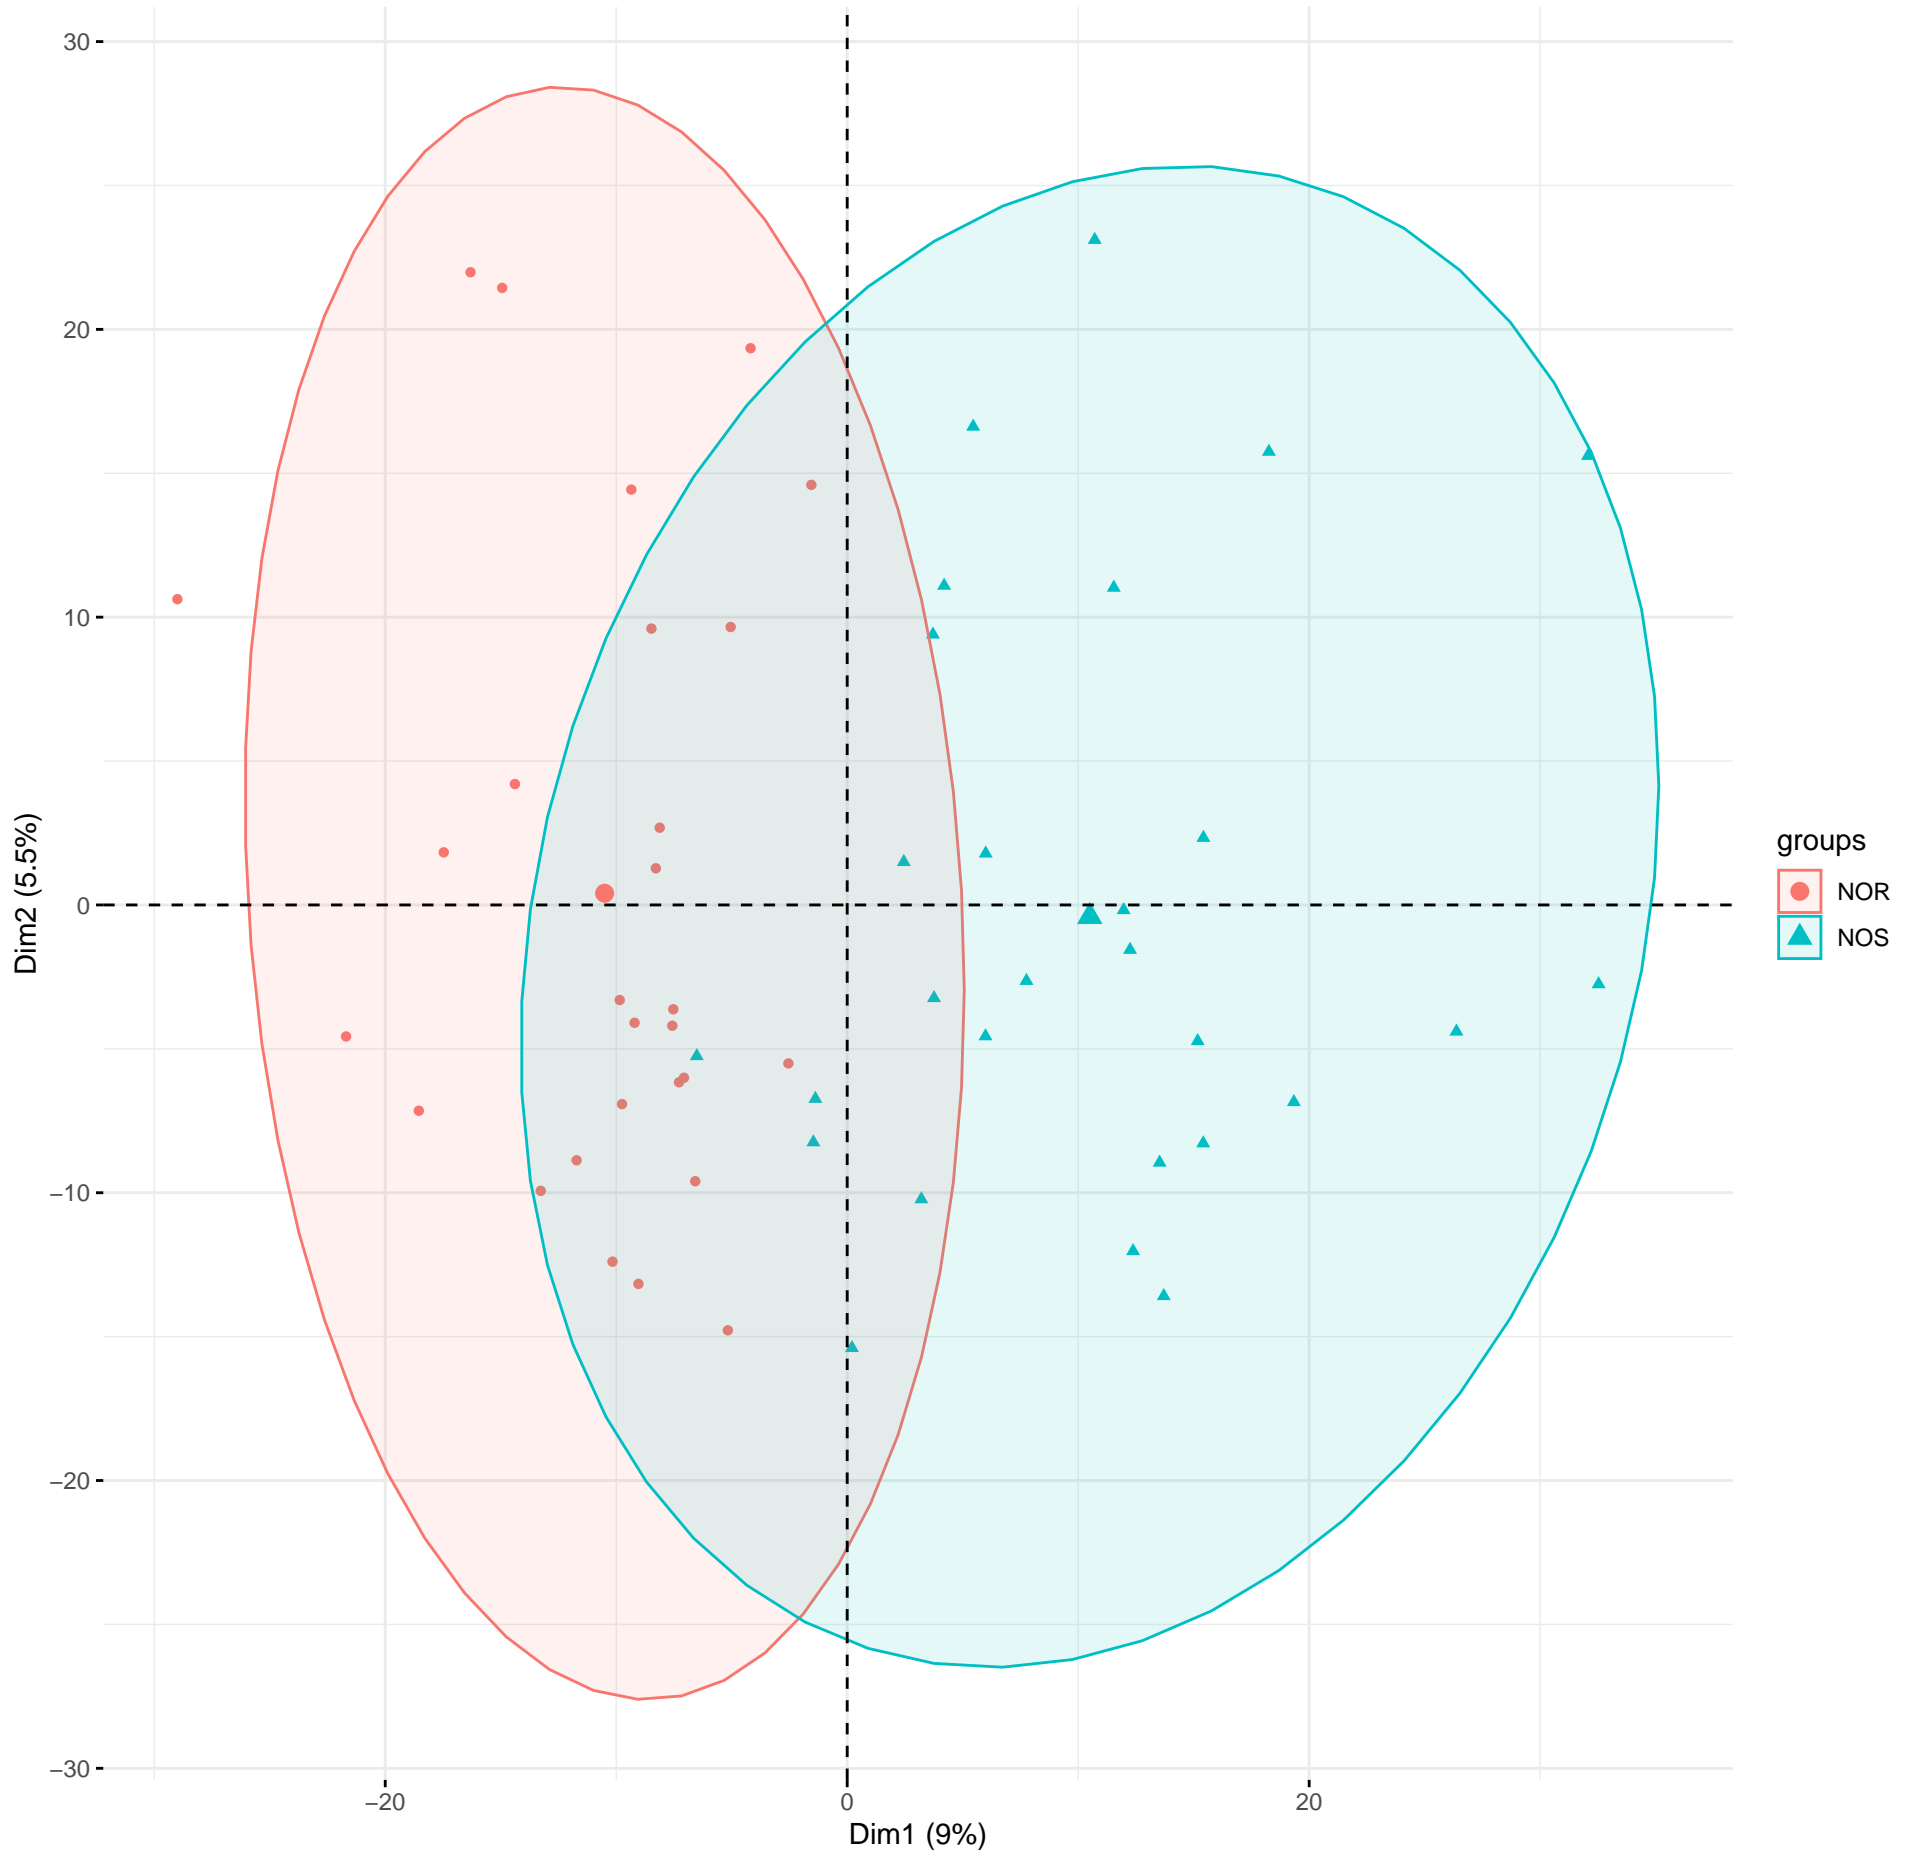

Supplement: Experimental_raw_data.zip [file Experimental_raw_data.zip]

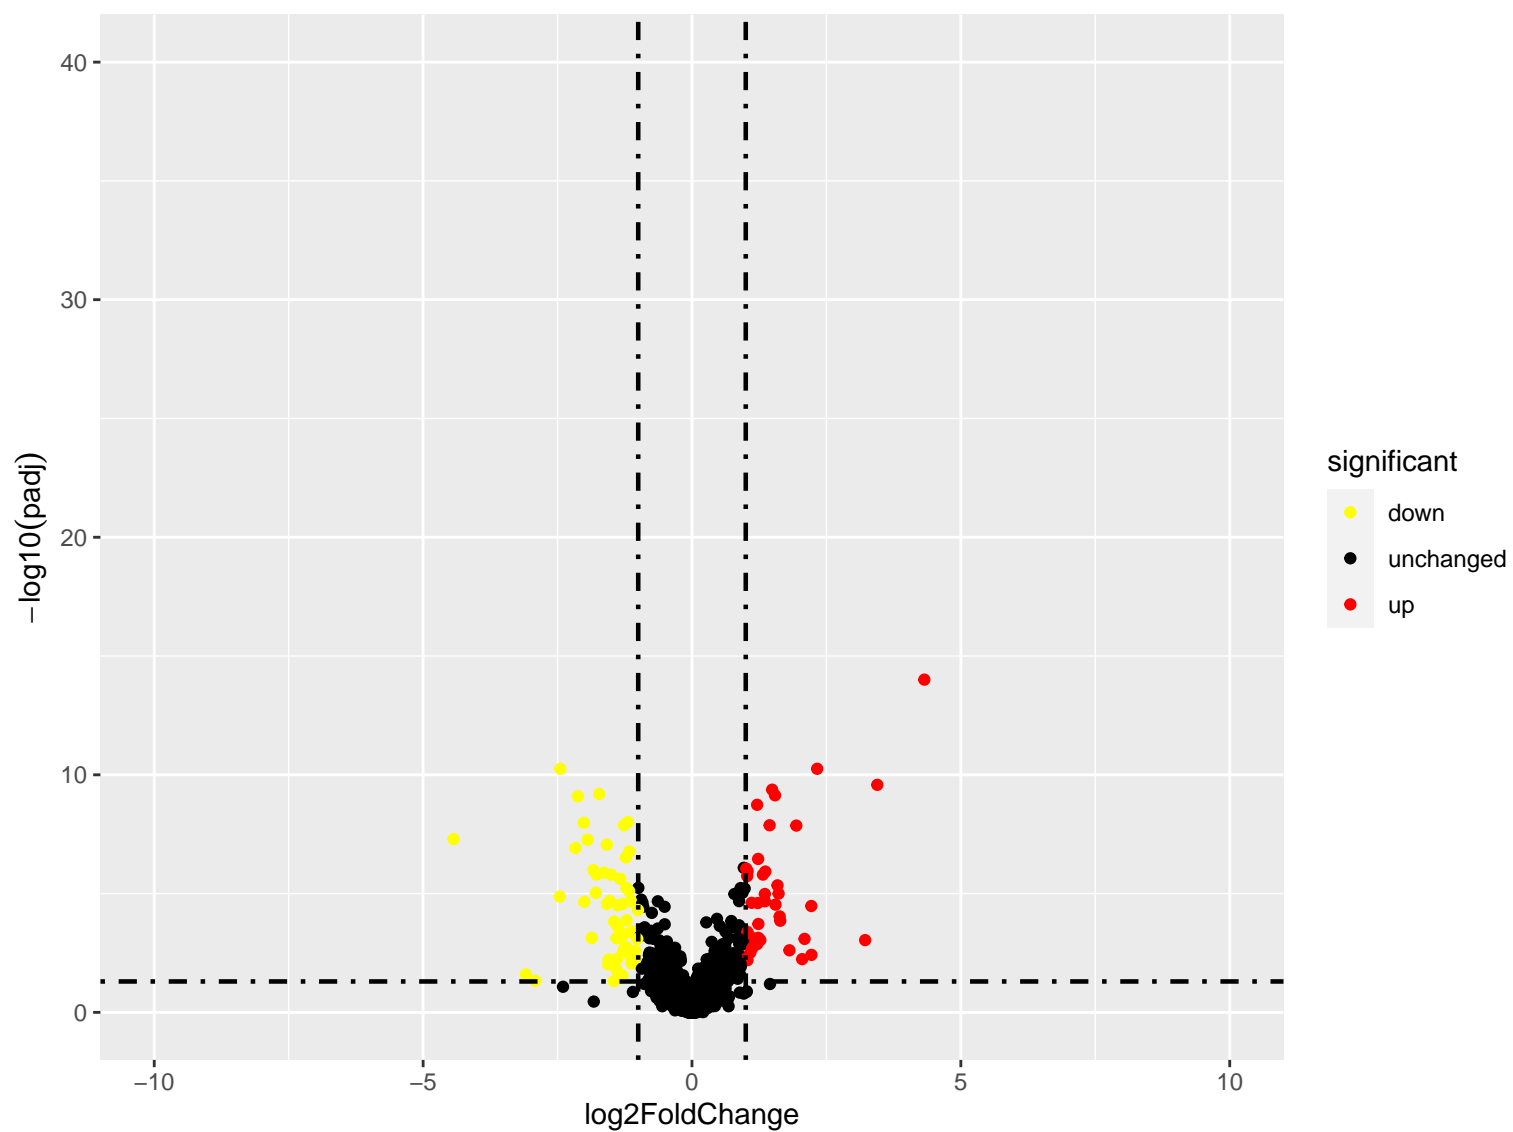

Supplement: Experimental_raw_data.zip [file Experimental_raw_data.zip]

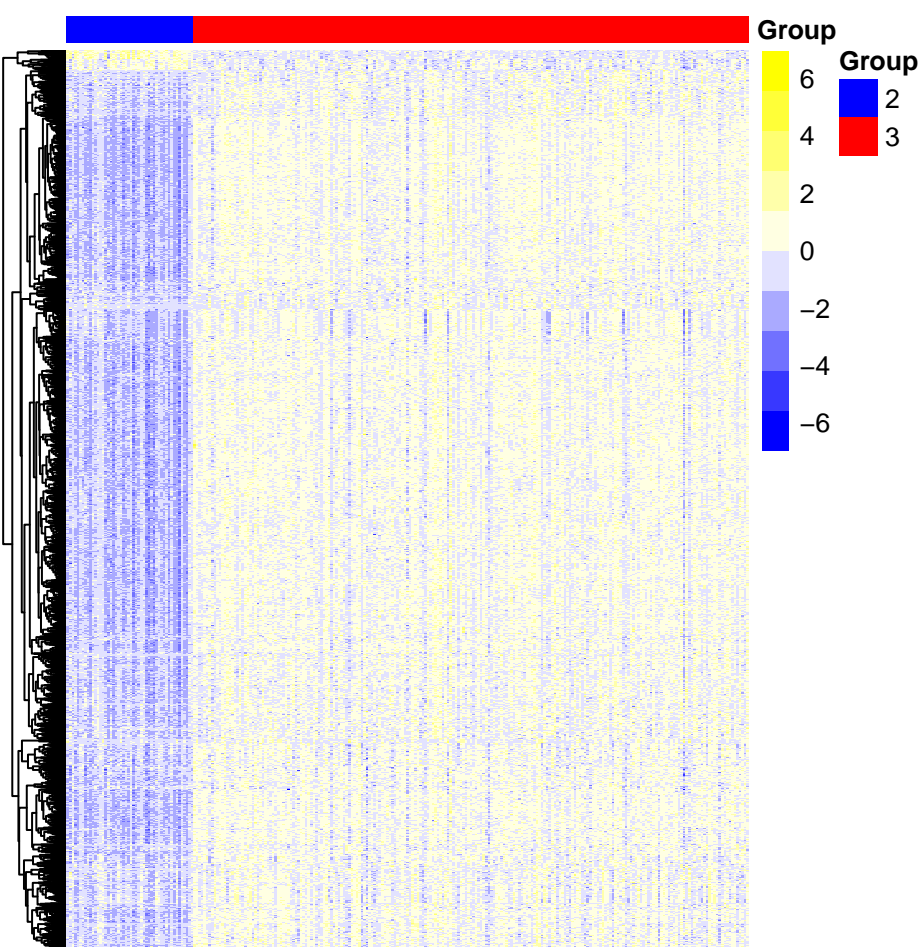

Supplement: Experimental_raw_data.zip [file Experimental_raw_data.zip]

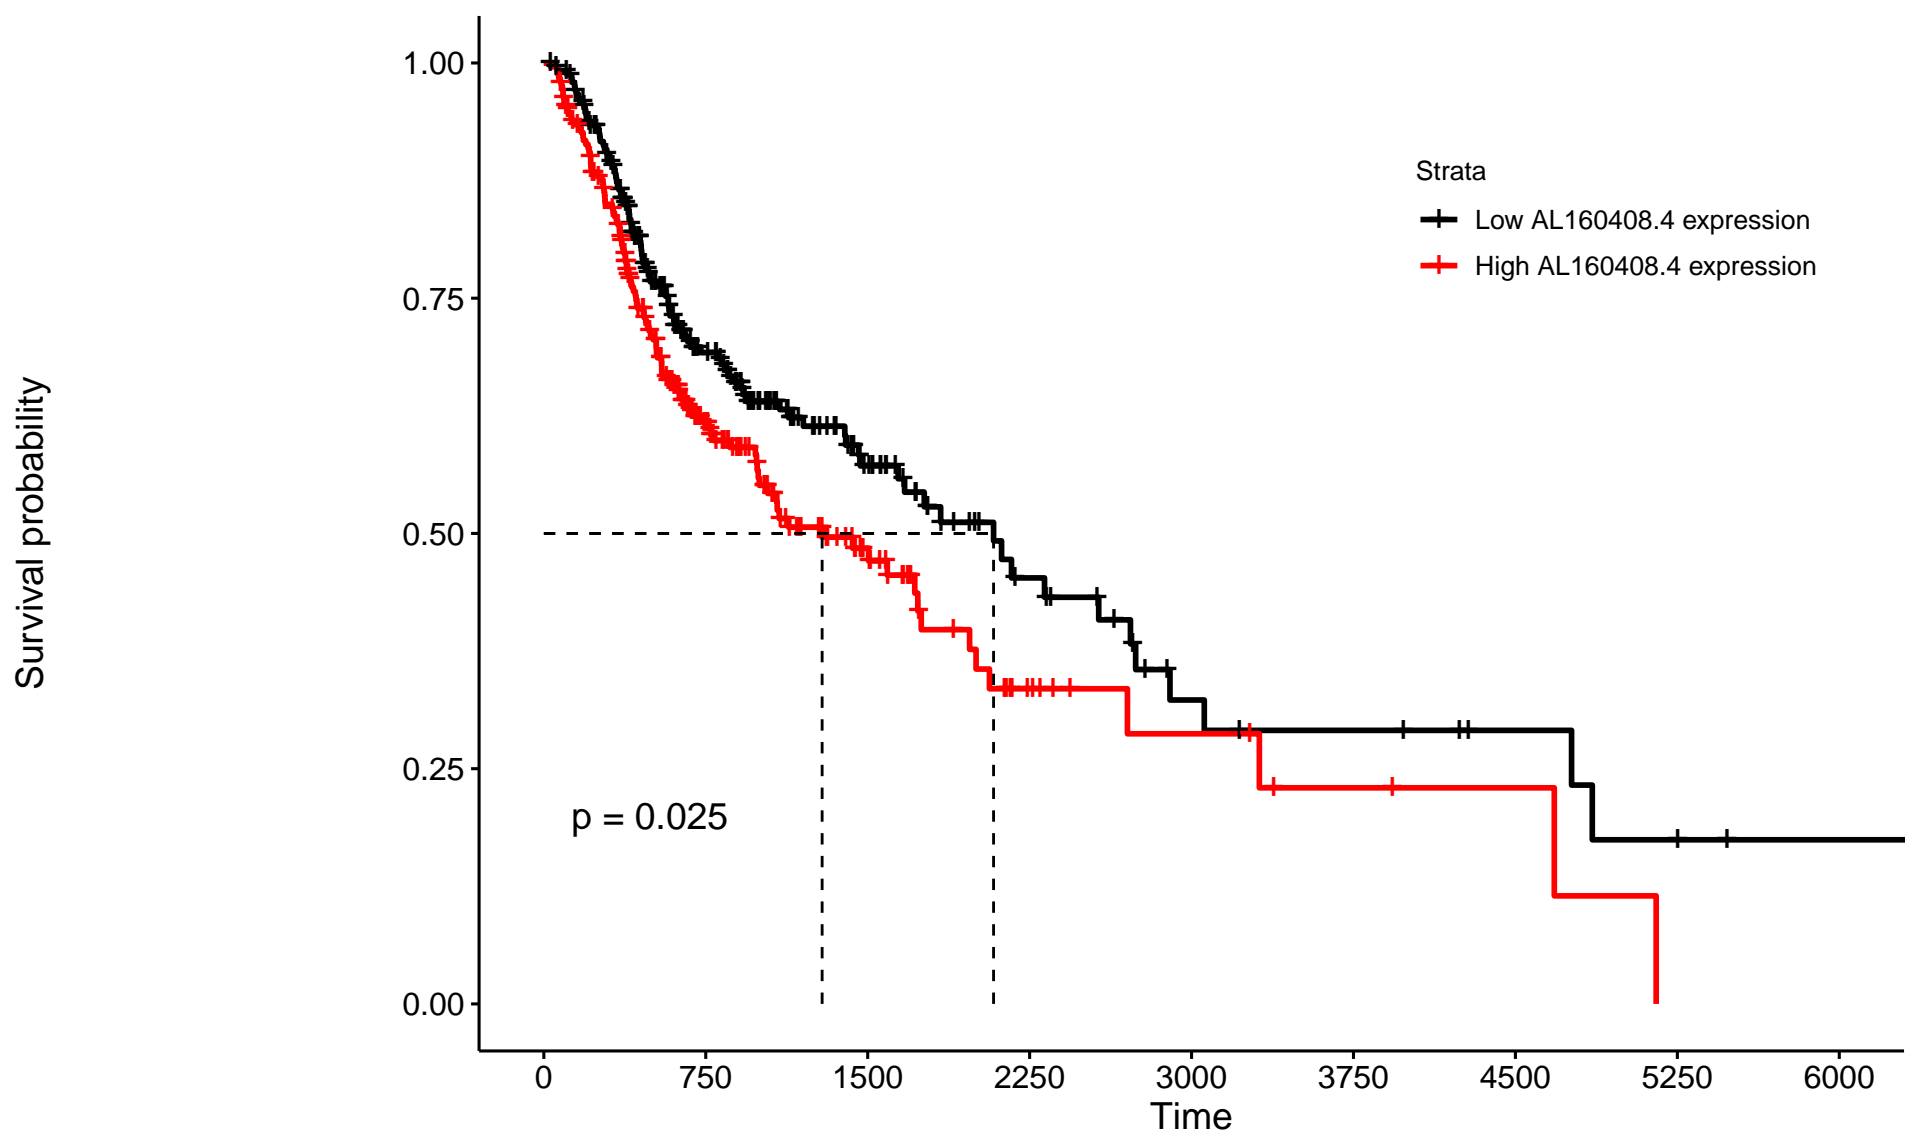

Number at risk

| Strata                     | 0   | 750 | 1500 | 2250 | 3000 | 3750 | 4500 | 5250 | 6000 |
|----------------------------|-----|-----|------|------|------|------|------|------|------|
| Low AL160408.4 expression  | 246 | 117 | 50   | 22   | 10   | 8    | 5    | 3    | 1    |
| High AL160408.4 expression | 246 | 98  | 36   | 11   | 6    | 3    | 2    | 0    | 0    |

Time

Supplement: Experimental_raw_data.zip [file Experimental_raw_data.zip]

### consensus CDF

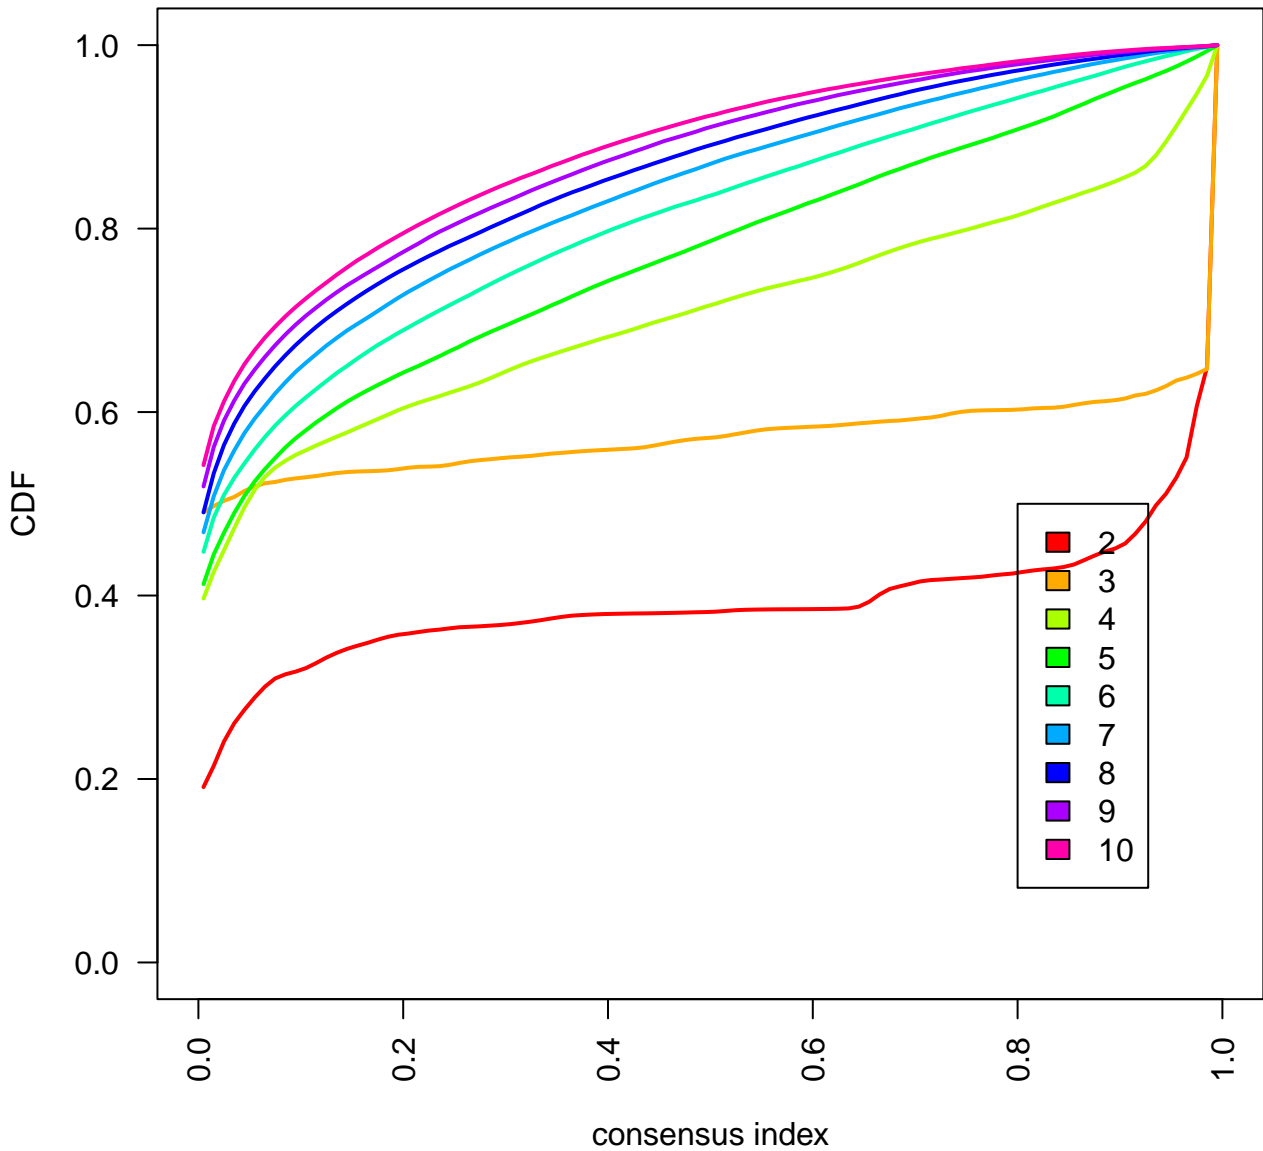

Supplement: Experimental_raw_data.zip [file Experimental_raw_data.zip]

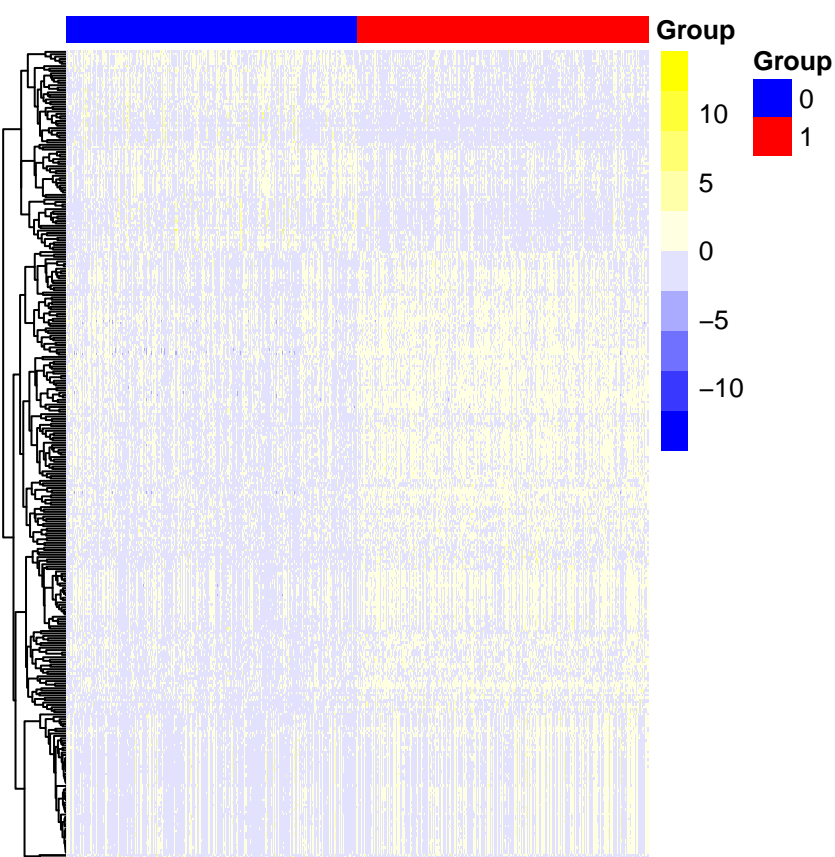

Supplement: Experimental_raw_data.zip [file Experimental_raw_data.zip]

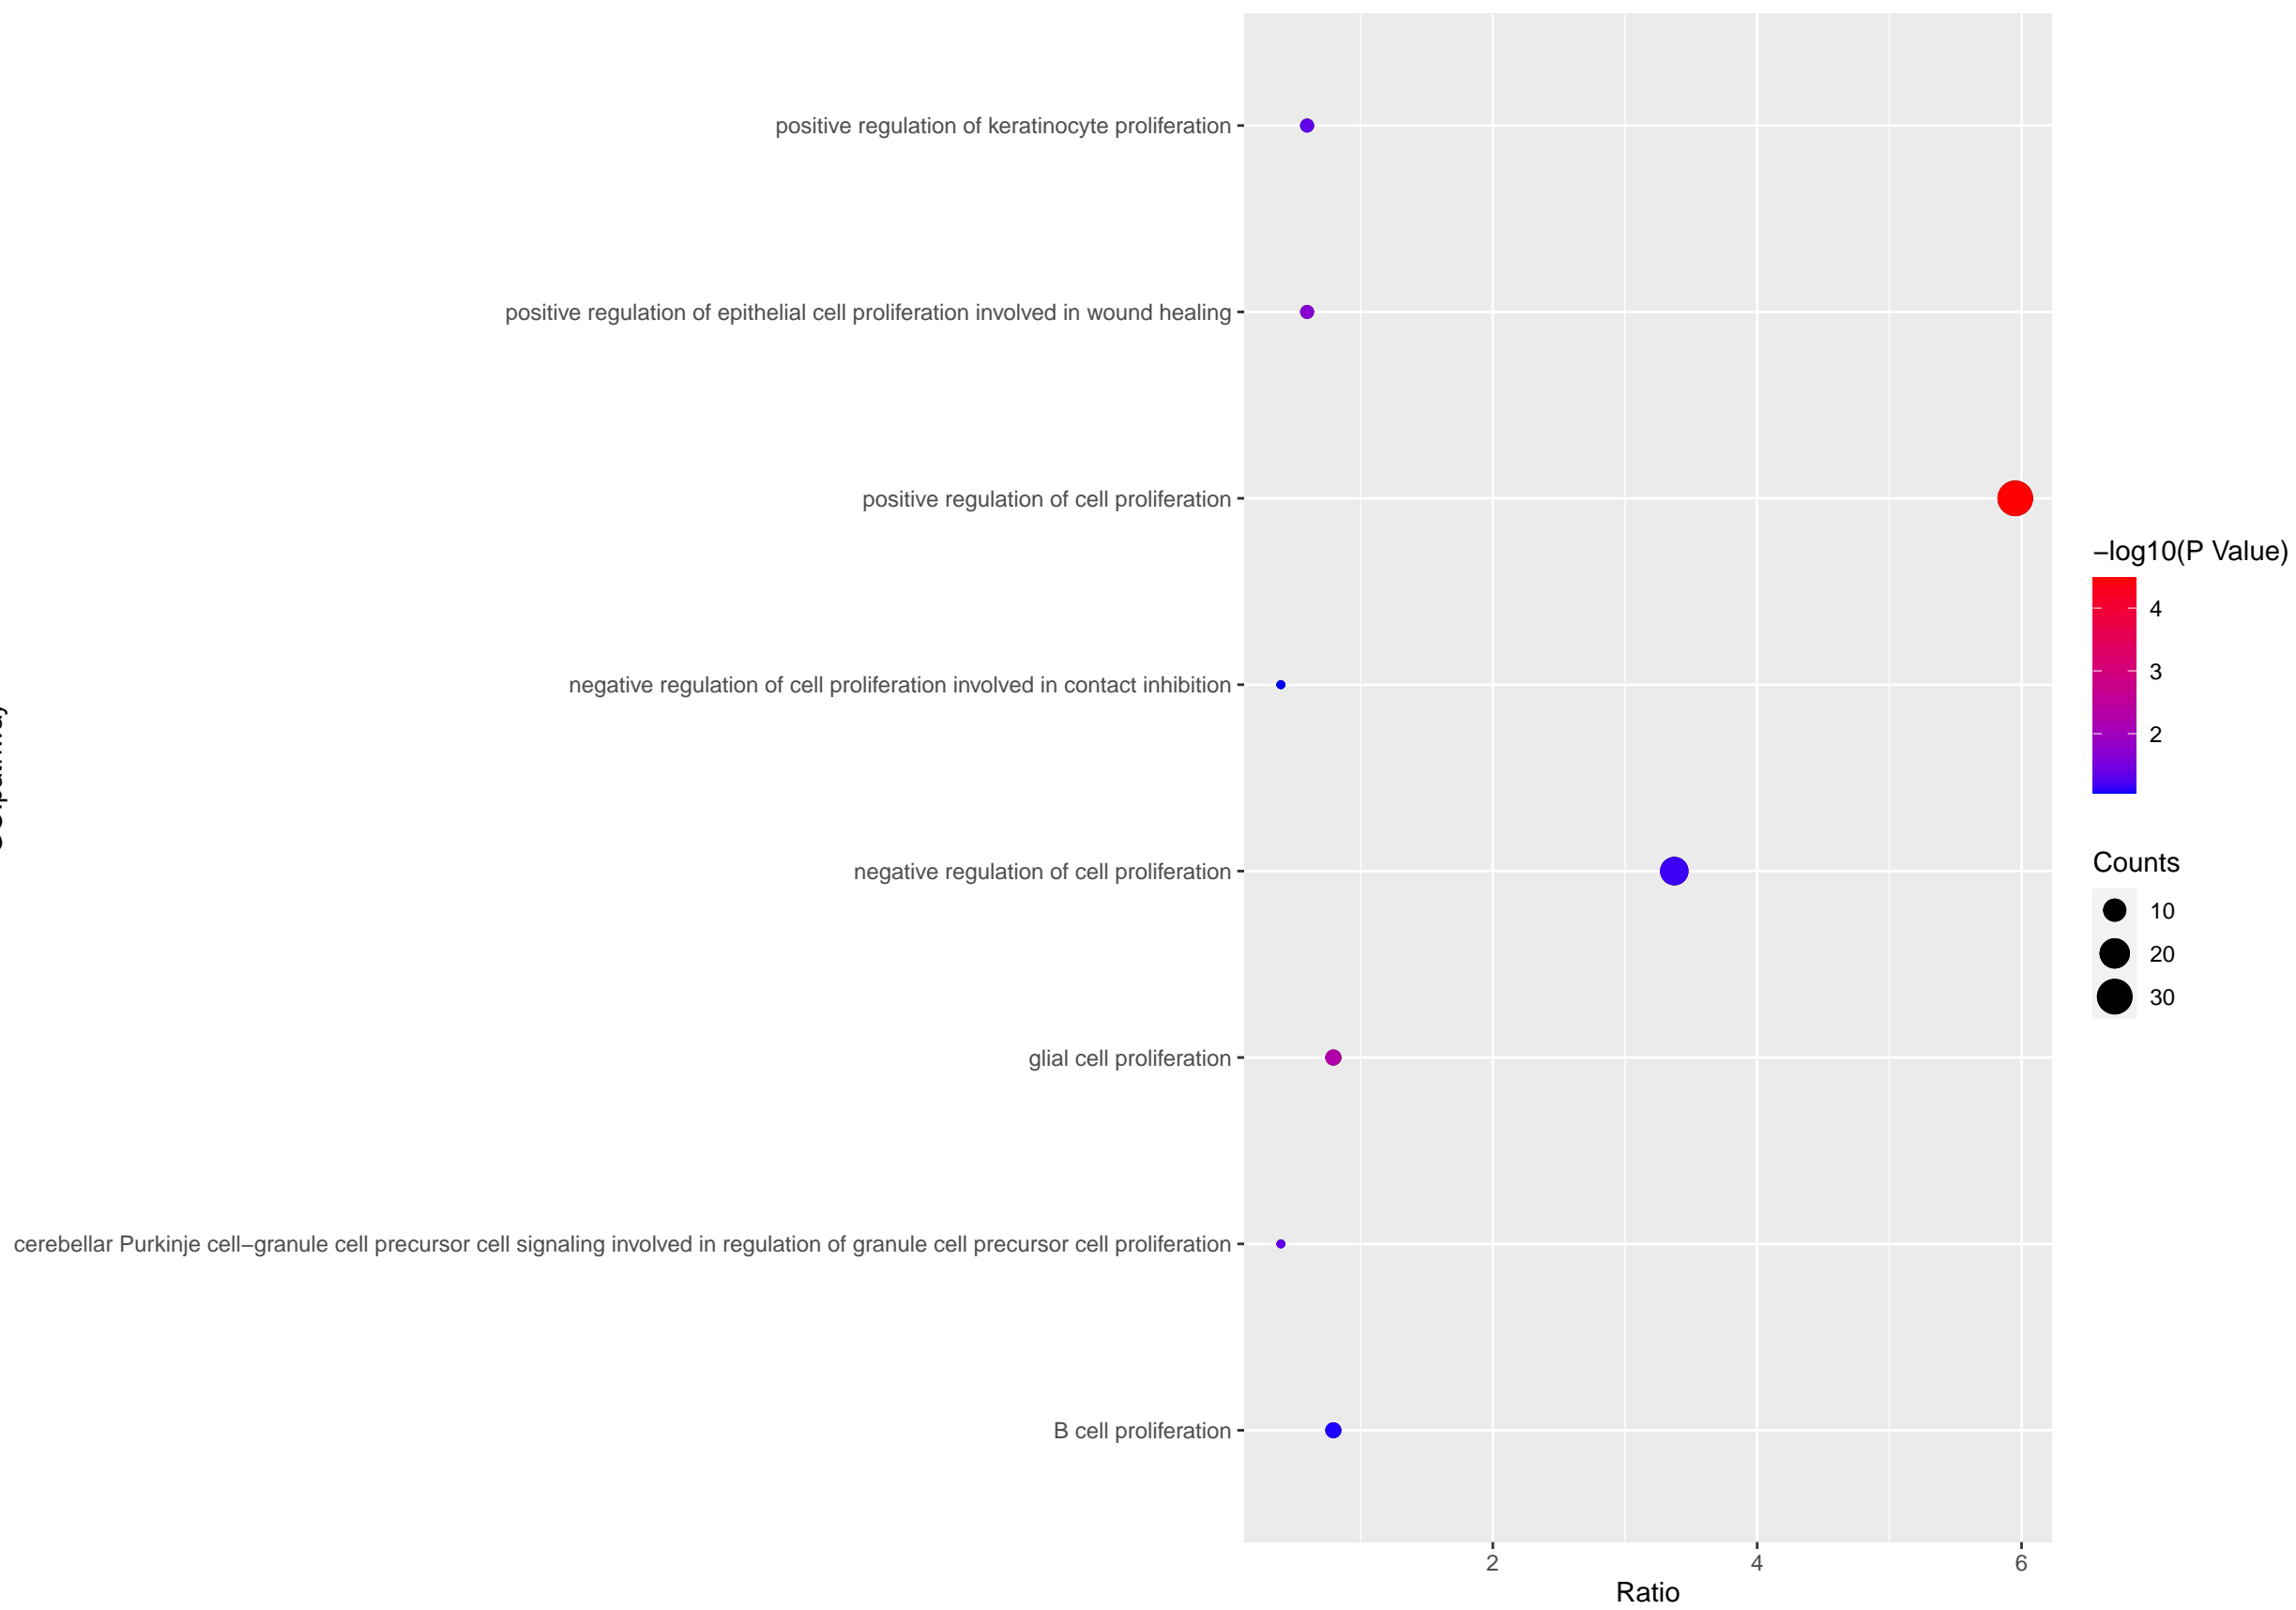

Supplement: Experimental_raw_data.zip [file Experimental_raw_data.zip]

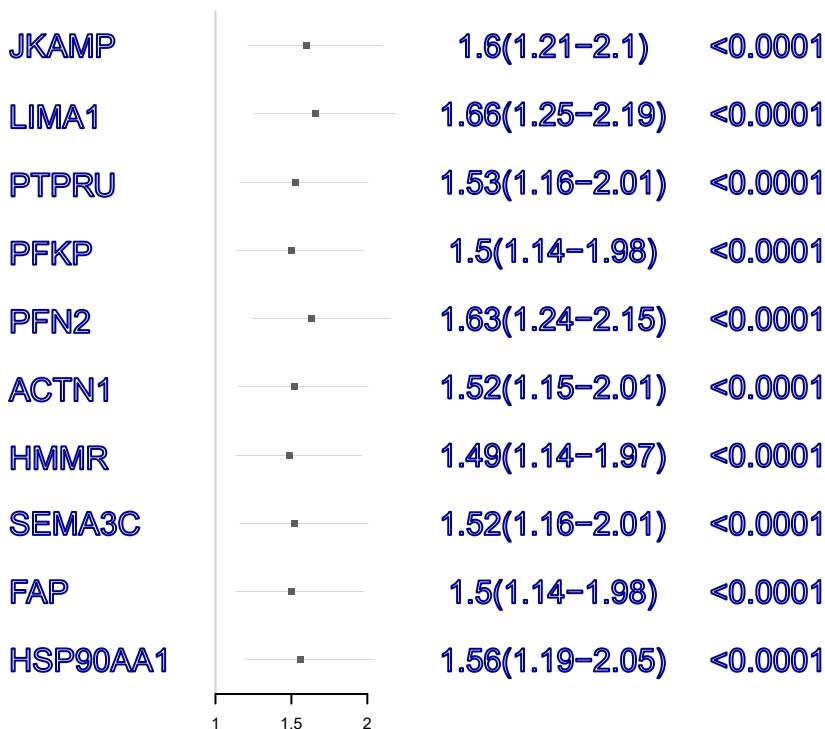

Supplement: Experimental_raw_data.zip [file Experimental_raw_data.zip]

## Delta area

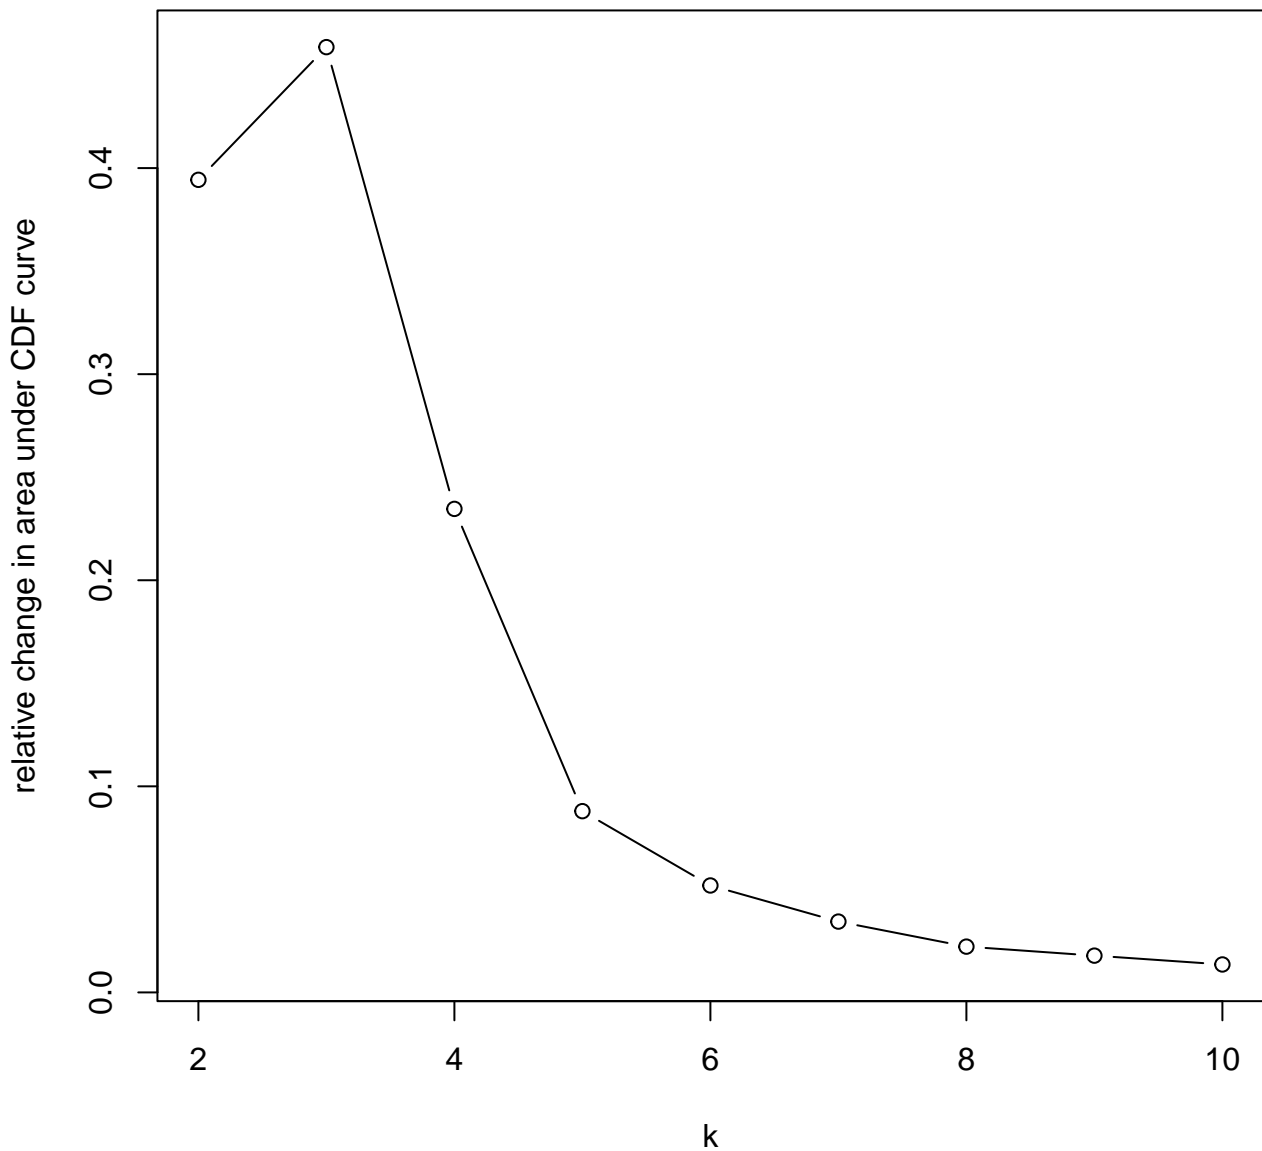

Supplement: Experimental_raw_data.zip [file Experimental_raw_data.zip]

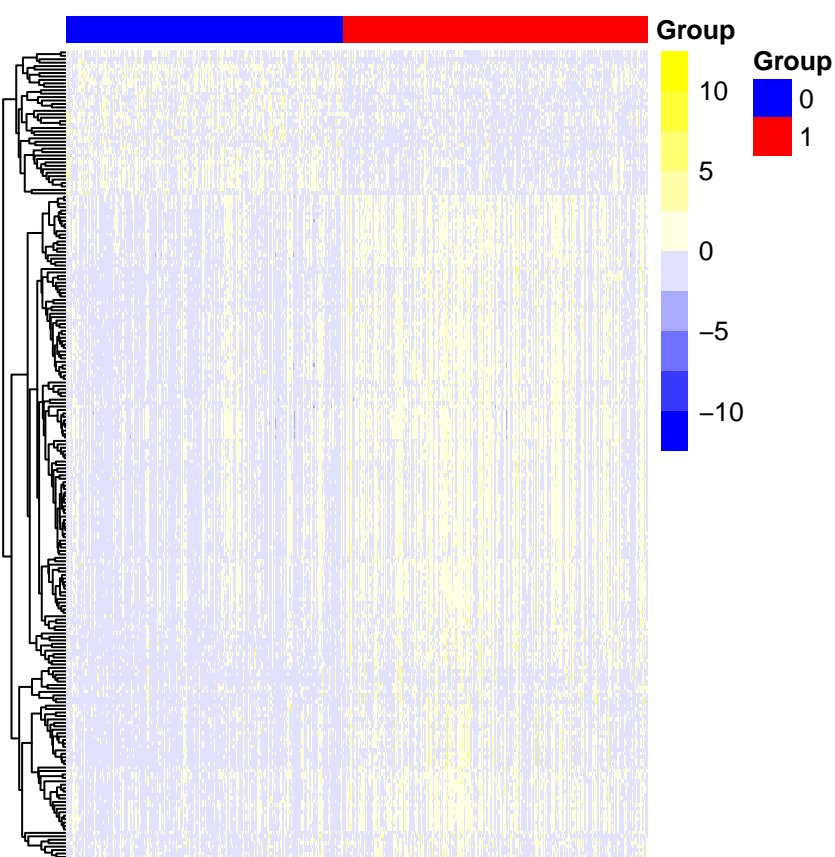

Supplement: Experimental_raw_data.zip [file Experimental_raw_data.zip]

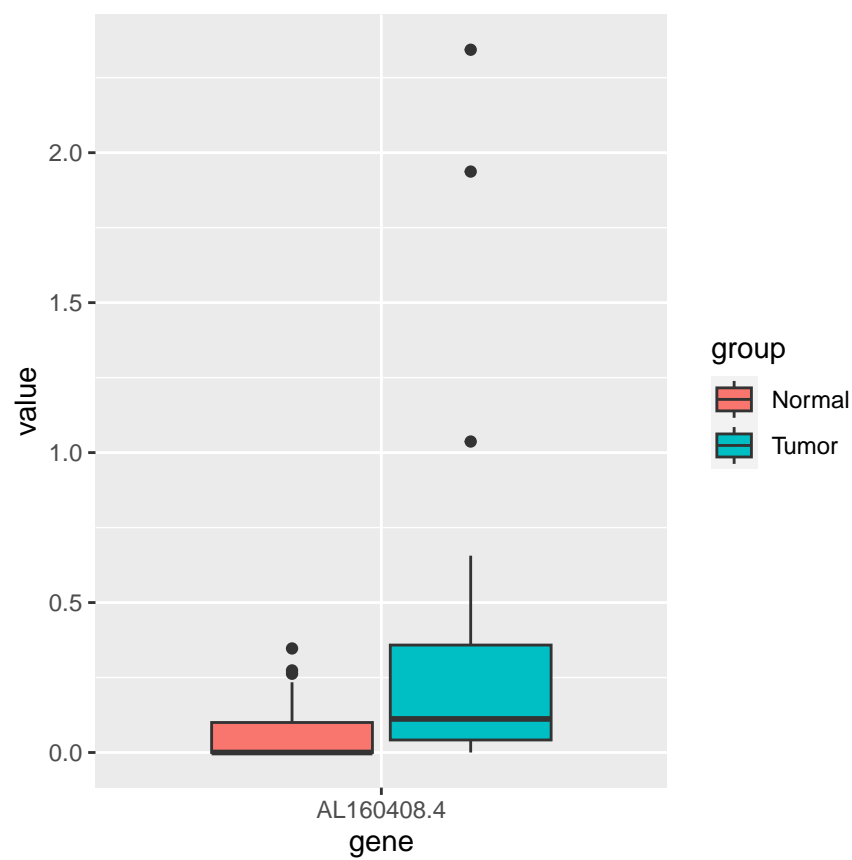

Supplement: Experimental_raw_data.zip [file Experimental_raw_data.zip]

oncogene

up

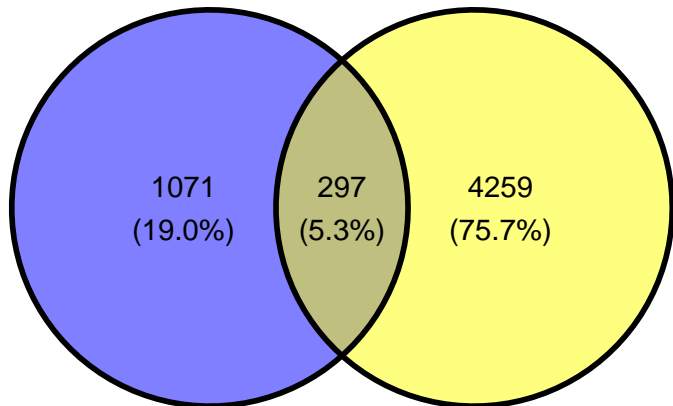

Supplement: Experimental_raw_data.zip [file Experimental_raw_data.zip]

hsa-miR-30e-5p

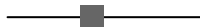

0.75(0.58-0.97)

0.03

hsa-miR-99a-3p

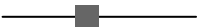

0.74(0.57-0.96)

0.02

hsa-let-7c-3p

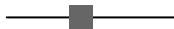

0.67(0.52-0.86)

<0.0001

0.525 0.6 0.675 0.75 0.825 0.9 0.975

Supplement: Experimental_raw_data.zip [file Experimental_raw_data.zip]

mRNA\_up

lncRNA\_up

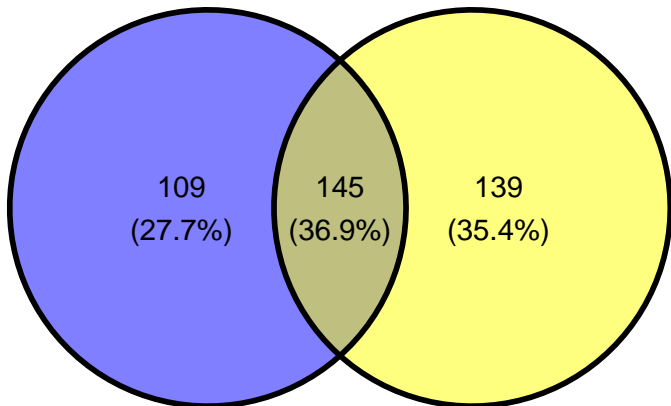

Supplement: Experimental_raw_data.zip [file Experimental_raw_data.zip]
